# Supplementary material for: Comparative Genomic and Phenotypic Characterization of Pathogenic and Non-Pathogenic Strains of Xanthomonas arboricola Reveals Insights into the Infection Process of Bacterial Spot Disease of Stone Fruits
Source: PLoS One. 2016 Aug 29;11(8):e0161977. doi: 10.1371/journal.pone.0161977 (PMC5003339; doi:10.1371/journal.pone.0161977)
Supplement: S1 Table — (XLSX) [file pone.0161977.s005.xlsx]

## Sheet: Hoja2
S1 Table. Genome statistics of 18 X. arboricola strains according to the automatic annotation performed using Prokka.
Taxon	Strains	Genbank ID	Host	Pathogenicity	Country of isolation	Genome size (bp)	%GC	Protein coding sequences (CDS)	Genes with function prediction	RNA genes	CRISPR repeats	CDS shared with strain CITA 44	Unique CDS CITA 44	Reference*
X. arboricola	3004	AZQY01	Hordeum vulgare	Yes	Russia	4,765,897	66.00	3.917	2.221	61	2	3.485	441	Ignatov et al. 2015
X. arboricola	CFBP 7634	JZEH01	Juglans regia	No	France	4,935,084	65.60	4.089	2.264	57	0	3.363	563	Cesbron et al. 2015
X. arboricola	CFBP 7651	JZEI01	Juglans regia	No	France	5,031,811	65.50	4.172	2.321	59	1	3.379	547	Cesbron et al. 2015
X. arboricola	CITA 44	LJGM01	Prunus mahaleb	No	Spain	4,760,482	65.80	3.927	2.239	58	1	-	-	Garita-Cambronero et al. 2016
X. arboricola pv. celebensis	NCPPB 1630	JPHE01	Musa sp.	Yes	New Zealand	4,960,573	65.50	4.049	2.294	57	1	3.394	532	Harrison et al. 2016
X. arboricola pv. celebensis	NCPPB 1832	JPHC01	Musa sp.	Yes	New Zealand	4,904,903	65.60	4.034	2.301	55	1	3.42	506	Harrison et al. 2016
X. arboricola pv. corylina	NCCB 100457	APMC02	Corylus avellana	Yes	United Stated of America	5,227,695	65.50	4.334	2.329	60	1	3.284	642	Ibarra et al. 2013
X. arboricola pv. juglandis	CFBP 2528	JZEF01	Juglans regia	Yes	New Zealand	5,083,377	65.50	4.25	2.346	56	1	3.264	662	Cesbron et al. 2015
X. arboricola pv. juglandis	CFBP 7179	JZEG01	Juglans regia	Yes	France	5,156,557	65.40	4.342	2.36	57	1	3.266	660	Cesbron et al. 2015
X. arboricola pv. juglandis	NCPPB 1447	AJTL01	Juglans regia	Yes	Romania	5,021,682	65.40	4.269	2.311	59	1	3.231	695	-
X. arboricola pv. juglandis	XajA3	LHBS01	Juglans regia	Yes	Chile	5,116,263	65.60	4.251	2.349	56	1	3.282	644	Higuera et al. 2015
X. arboricola pv. juglandis	Xaj2	LHBK01	Juglans regia	Yes	Chile	5,101,226	65.40	4.252	2.318	55	1	3.244	682	Higuera et al. 2015
X. arboricola pv. juglandis	Xaj4.1	LHBL01	Juglans regia	Yes	Chile	5,116,263	65.60	4.249	2.354	54	1	3.285	641	Higuera et al. 2015
X. arboricola pv. juglandis	Xaj43a	LHBT01	Juglans regia	Yes	Chile	5,144,142	65.40	4.291	2.334	55	1	3.267	659	Higuera et al. 2015
X. arboricola pv. juglandis	Xaj 417	CP012251.1	Juglans regia	Yes	United Stated of America	5,218,943	65.40	4.331	2.368	58	2	3.283	643	Pereira et al. 2015
X. arboricola pv. pruni	CITA 33	JHUQ01	Prunus amygdalus	Yes	Spain	5,100,656	65.40	4.371	2.336	54	1	3.28	646	Garita-Cambronero et al. 2014
X. arboricola pv. pruni	IVIA2626.1	LJGN01	Prunus salicina	Yes	Spain	5,027,671	65.40	4.254	2.295	54	1	3.257	669	Garita-Cambronero et al. 2016
X. arboricola pv. pruni	MAFF 301420	BAVC01	Prunus persica	Yes	Japan	5,002,761	65.30	4.491	2.277	54	1	3.181	745	-
	*For full references information see the article
