# Supplementary material for: Comparative Genomic and Phenotypic Characterization of Pathogenic and Non-Pathogenic Strains of Xanthomonas arboricola Reveals Insights into the Infection Process of Bacterial Spot Disease of Stone Fruits
Source: PLoS One. 2016 Aug 29;11(8):e0161977. doi: 10.1371/journal.pone.0161977 (PMC5003339; doi:10.1371/journal.pone.0161977)
Supplement: S4 Table — (XLSX) [file pone.0161977.s008.xlsx]

## Sheet: Hoja2
S4 table: Orthologous protein coding sequences (CDS) of nine strains of Xanthomonas arboricola associated with pathogenesis.
	Locus	Species	Reference*	Gene symbol	Gene description	X. arboricola pv. pruni CITA33			X. arboricola pv. pruni IVIA 2626.1			X. arborcola CITA 44			X. arboricola pv. juglandis CFBP 7179			X. arboricola pv. celebensis NCPPB 1630			X. arboricola pv. corylina NCCB 100457			X. arboricola 3004			X. arboricola CFBP 7634			X. arboricola CFBP 7651
						GenBank Locus tag	% coverage	% identity	GenBank Locus tag	% coverage	% identity	GenBank Locus tag	% coverage	% identity	GenBank Locus tag	% coverage	% identity	GenBank Locus tag	% coverage	% identity	GenBank Locus tag	% coverage	% identity	GenBank Locus tag	% coverage	% identity	GenBank Locus tag	% coverage	% identity	GenBank Locus tag	% coverage	% identity
Pectolytic enzimes	XCC2266	Xanthomonas campestris pv. campestris ATCC33913	Silva et al. 2002; Wang et al. 2008	pglA=pehD=pghBxc	Polygalacturonase	DK27_RS19655	96.0	91.0	-	-	-	AN651_07010	96.0	90.0	XARJCFBP7179_RS06910	96.0	90.0	GW16_RS15305	96.0	90.0	J123_RS10400	96.0	91.0	-	-	-	XARJCFBP7634_RS01275	96.0	90.0	XARJCFBP7651_RS10555	96.0	89.0
	XCC3459	Xanthomonas campestris pv. campestris ATCC33913	Silva et al. 2002; Wang et al. 2008	peh-1=pehA=pghAxc	Polygalacturonase	DK27_18200	99.0	84.0	AN652_18415	99.0	84.0	AN651_10105	99.0	83.0	XARJCFBP7179_RS01800	99.0	84.0	GW16_RS18200	99.0	84.0	J123_RS03905	99.0	84.0	X783_RS0119905	99.0	84.0	XARJCFBP7634_RS08925	99.0	84.0	XARJCFBP7651_RS02665	99.0	84.0
	XCC0122	Xanthomonas campestris pv. campestris ATCC33913	Silva et al. 2002	-	Pectate lyase	-	-	-	-	-	-	AN651_RS08810	91.0	91.0	-	-	-	GW16_RS02285	91.0	91.0	-	-	-	X783_RS0114830	91.0	91.0	XARJCFBP7634_RS11680	91.0	91.0	XARJCFBP7651_RS18880	91.0	91.0
	XCC0644	Xanthomonas campestris pv. campestris ATCC33913	Vandreomme et al. 2013	pel	Pectate lyase	-	-	-	-	-	-	-	-	-	-	-	-	GW16_05540	95.0	92.0	-	-	-	X783_RS0110110	95.0	94.0	XARJCFBP7634_RS16970	95.0	92.0	XARJCFBP7651_RS15705	95.0	92.0
	XCC0645	Xanthomonas campestris pv. campestris ATCC33913	Vandreomme et al. 2013	pel	Pectate lyase	-	-	-	-	-	-	-	-	-	-	-	-	GW16_RS05360	88.0	92.0	-	-	-	-	-	-	-	-	-	XARJCFBP7651_RS15700	88.0	92.0
	XCR_0796	Xanthomonas campestris pv. raphani 756C	Vandreomme et al. 2013		Pectate lyase	-	-	-	-	-	-	-	-	-	-	-	-	-	-	-	-	-	-	-	-	-	-	-	-	-	-	-
	XCC2815	Xanthomonas campestris pv. campestris ATCC33913	Silva et al. 2002	pel2	Pectate lyase	DK27_19260	99.0	92.0	AN652_09970	99.0	92.0	AN651_06040	99.0	92.0	-	-	-	GW16_08090	99.0	92.0	-	-	-	X783_RS0107600	99.0	92.0	XARJCFBP7634_RS14405	99.0	92.0	XARJCFBP7651_RS13215	99.0	92.0
	XAC2373	Xanthomonas citri subsp. citri 306	Silva et al. 2002	pel	degenerated pectate lyase	DK27_RS19660	86.0	89.0	AN652_RS09430	86.0	89.0	-	-	-	XARJCFBP7179_RS06915	86.0	89.0	-	-	-	J123_RS10395	86.0	89.0	-	-	-	-	-	-	-	-	-
	XCV2278	Xanthomonas campestris pv. vesicatoria 85-10	Vandreomme et al. 2013	-	Pectate lyase	-	-	-	-	-	-	-	-	-	-	-	-	-	-	-	-	-	-	-	-	-	-	-	-	-	-	-
	XCC0121	Xanthomonas campestris pv. campestris ATCC33913	Silva et al. 2002	-	Pectin Methylesterase	-	-	-	-	-	-	AN651_08910	99.0	90.0	-	-	-	GW16_02375	99.0	90.0	-	-	-	X783_RS0114825	99.0	90.0	XARJCFBP7634_RS11685	99.0	90.0	XARJCFBP7651_RS18875	99.0	90.0
	XCC2265	Xanthomonas campestris pv. campestris ATCC33913	Silva et al. 2002	-	Pectin Methylesterase	-	-	-	-	-	-	AN651_07005	97.0	90.0	-	-	-	GW16_RS15300	97.0	89.0	-	-	-	-	-	-	XARJCFBP7634_RS01280	97.0	90.0	XARJCFBP7651_RS10550	97.0	90.0
	XCC0154	Xanthomonas campestris pv. campestris ATCC33913	Silva et al. 2002	-	Rhamnogalacturonan acetylesterase	DK27_14690	97.0	90.0	AN652_14690	97.0	90.0	AN651_10855	97.0	90.0	XARJCFBP7179_RS12795	97.0	89.0	GW16_RS02060	97.0	91.0	J123_RS12080	97.0	89.0	X783_RS0112550	97.0	90.0	XARJCFBP7634_RS11490	97.0	90.0	XARJCFBP7651_RS19070	97.0	90.0
	XAC3505	Xanthomonas citri subsp. citri 306	Silva et al. 2002	rhgB	Rhamnogalacturonase	DK27_08735	99.0	83.0	AN652_14965	99.0	83.0	AN651_18690	99.0	83.0	-	-	-	GW16_RS05675	99.0	83.0	J123_RS05435	99.0	83.0	X783_RS0108955	99.0	83.0	XARJCFBP7634_RS16660	99.0	83.0	XARJCFBP7651_RS15400	99.0	83.0
Cellulolytic enzymes	XCC0026	Xanthomonas campestris pv. campestris ATCC33913	Silva et al. 2002	egl	Cellulase	DK27_06615	98.0	80.0	AN652_02500	98.0	80.0	AN651_08435	98.0	80.0	XARJCFBP7179_RS13480	98.0	80.0	GW16_RS02855	98.0	80.0	J123_RS16985	98.0	80.0	X783_RS0120030	98.0	80.0	XARJCFBP7634_RS12240	98.0	80.0	XARJCFBP7651_RS18320	98.0	80.0
	XCC0027	Xanthomonas campestris pv. campestris ATCC33913	Silva et al. 2002	egl	Cellulase	DK27_06610	94.0	82.0	AN652_02505	93.0	82.0	AN651_08440	91.0	82.0	XARJCFBP7179_RS13475	91.0	82.0	GW16_02990	94.0	81.0	J123_RS16980	93.0	81.0	X783_RS0120025	91.0	82.0	XARJCFBP7634_RS12235	91.0	82.0	XARJCFBP7651_RS18325	93.0	81.0
	XCC0028	Xanthomonas campestris pv. campestris ATCC33913	Silva et al. 2002	egl	Cellulase	DK27_12605	89.0	87.0	AN652_02510	89.0	87.0	AN651_08450	89.0	86.0	XARJCFBP7179_RS13465	89.0	87.0	GW16_RS02845	89.0	87.0	J123_RS16975	89.0	87.0	X783_RS0120020	89.0	86.0	XARJCFBP7634_RS12225	89.0	87.0	XARJCFBP7651_RS18330	89.0	87.0
	XCC1752	Xanthomonas campestris pv. campestris ATCC33913	Silva et al. 2002	-	Cellulase	DK27_17920	99.0	86.0	AN652_19200	99.0	86.0	AN651_02725	99.0	85.0	XARJCFBP7179_RS06035	99.0	86.0	GW16_RS11200	99.0	85.0	J123_RS21885	99.0	85.0	X783_RS0114260	99.0	86.0	XARJCFBP7634_RS03640	99.0	86.0	XARJCFBP7651_RS07915	99.0	89.0
	XCC2387	Xanthomonas campestris pv. campestris ATCC33913	Silva et al. 2002	egl2	Cellulase	-	-	-	-	-	-	AN651_19515	99.0	88.0	XARJCFBP7179_RS06305	99.0	89.0	GW16_RS15915	99.0	88.0	J123_RS14995	99.0	88.0	X783_RS0115705	99.0	88.0	XARJCFBP7634_RS00680	99.0	88.0	XARJCFBP7651_RS11160	99.0	88.0
	XCC3380	Xanthomonas campestris pv. campestris ATCC33913	Silva et al. 2002	celS	Cellulase	-	-	-	-	-	-	-	-	-	-	-	-	-	-	-	-	-	-	-	-	-	-	-	-	-	-	-
	XCC3381	Xanthomonas campestris pv. campestris ATCC33913	Silva et al. 2002	celS	Cellulase	DK27_08745	99.0	92.0	AN652_14975	99.0	92.0	AN651_18695	99.0	93.0	XARJCFBP7179_RS18025	99.0	92.0	GW16_05870	99.0	93.0	J123_RS05425	99.0	92.0	-	-	-	XARJCFBP7634_RS16670	99.0	93.0	XARJCFBP7651_RS15410	99.0	93.0
	XCC3521	Xanthomonas campestris pv. campestris ATCC33913	Silva et al. 2002	engXCA	Cellulase	DK27_11470	99.0	90.0	AN652_03765	99.0	90.0	AN651_10335	99.0	92.0	XARJCFBP7179_RS02035	99.0	90.0	GW16_RS17965	99.0	91.0	J123_RS04145	99.0	89.0	X783_RS0101585	99.0	86.0	XARJCFBP7634_RS09165	99.0	91.0	XARJCFBP7651_RS02415	99.0	91.0
	XCC3535	Xanthomonas campestris pv. campestris ATCC33913	Silva et al. 2002	-	Cellulase	-	-	-	-	-	-	AN651_13410	99.0	75.0	-	-	-	GW16_RS17890	99.0	75.0	-	-	-	X783_RS0101660	99.0	76.0	XARJCFBP7634_RS09235	99.0	76.0	XARJCFBP7651_RS02345	99.0	76.0
	XAC3516	Xanthomonas citri subsp. citri 306	Silva et al. 2002	-	Cellulase	-	-	-	-	-	-	AN651_15150	92.0	89.0	XARJCFBP7179_RS17920	99.0	87.0	GW16_RS05560	99.0	87.0	-	-	-	X783_RS0119170	84.0	89.0	XARJCFBP7634_RS16775	99.0	87.0	XARJCFBP7651_RS15515	99.0	87.0
	XCC3160	Xanthomonas citri subsp. citri 306	Silva et al. 2002		Cellobiodase	-	-	-	-	-	-	-	-	-	-	-	-	-	-	-	-	-	-	-	-	-	-	-	-	-	-	-
	XCC3534	Xanthomonas campestris pv. campestris ATCC33913	Silva et al. 2002		Cellobiodase	-	-	-	-	-	-	-	-	-	-	-	-	-	-	-	-	-	-	-	-	-	-	-	-	-	-	-
	XCC1090	Xanthomonas campestris pv. campestris ATCC33913	Silva et al. 2002	bglX	Beta-glucosidase	-	-	-	AN652_12550	99.0	76.0	AN651_00645	99.0	76.0	XARJCFBP7179_RS20265	99.0	76.0	GW16_RS00065	99.0	87.0	J123_RS16350	99.0	76.0	X783_RS0106960	99.0	76.0	XARJCFBP7634_RS06530	99.0	76.0	XARJCFBP7651_RS01620	99.0	86.0
	XCC1250	Xanthomonas campestris pv. campestris ATCC33913	Silva et al. 2002		Beta-glucosidase	-	-	-	-	-	-	-	-	-	-	-	-	GW16_RS20490	94.0	74.0	-	-	-	-	-	-	-	-	-	XARJCFBP7651_RS04950	94.0	74.0
	XCC1775	Xanthomonas campestris pv. campestris ATCC33913	Silva et al. 2002	celD	Beta-glucosidase	-	-	-	AN652_14580	99.0	94.0	-	-	-	XARJCFBP7179_RS06150	99.0	95.0	GW16_RS12940	99.0	94.0	J123_RS17480	99.0	94.0	X783_RS0120155	99.0	94.0	XARJCFBP7634_RS03525	99.0	95.0	XARJCFBP7651_RS08030	99.0	95.0
	XCC2892	Xanthomonas campestris pv. campestris ATCC33913	Silva et al. 2002	-	Beta-glucosidase	DK27_02585	99.0	92.0	AN652_08910	99.0	92.0	AN651_01660	99.0	92.0	XARJCFBP7179_RS10935	99.0	92.0	GW16_RS07435	99.0	92.0	J123_RS09895	99.0	92.0	X783_RS0116840	99.0	92.0	XARJCFBP7634_RS14775	99.0	92.0	XARJCFBP7651_RS13590	99.0	92.0
	XCC4106	Xanthomonas campestris pv. campestris ATCC33913	Silva et al. 2002	-	Beta-glucosidase	DK27_02395	94.0	92.0	AN652_16865	99.0	90.0	AN651_08335	99.0	90.0	XARJCFBP7179_RS14440	94.0	93.0	GW16_RS11260	99.0	90.0	J123_RS19810	99.0	90.0	X783_RS0100540	99.0	90.0	XARJCFBP7634_RS20375	99.0	90.0	XARJCFBP7651_RS20815	99.0	90.0
	XCC1404	Xanthomonas campestris pv. campestris ATCC33913	Silva et al. 2002	bglS	Beta-glucosidase	DK27_07585	94.0	93.0	AN652_15630	94.0	93.0	AN651_07180	94.0	94.0	XARJCFBP7179_RS21675	94.0	93.0	GW16_RS09680	94.0	93.0	J123_RS00355	94.0	93.0	X783_RS0108740	94.0	93.0	XARJCFBP7634_RS05145	94.0	93.0	XARJCFBP7651_RS06560	94.0	93.0
	XCC3814	Xanthomonas campestris pv. campestris ATCC33913	Silva et al. 2002	bglX	Beta-glucosidase	DK27_15420	99.0	94.0	AN652_11385	99.0	94.0	AN651_02275	99.0	95.0	XARJCFBP7179_RS15950	99.0	95.0	GW16_RS03565	99.0	95.0	J123_RS18450	99.0	95.0	X783_RS0108405	99.0	95.0	XARJCFBP7634_RS18895	99.0	95.0	XARJCFBP7651_RS17590	99.0	95.0
Hemilcellulolytic enzimes	XCC0144	Xanthomonas campestris pv. campestris ATCC33913	Silva et al. 2002	xynB	Xylanase	DK27_14740	91.0	85.0	AN652_20545	91.0	85.0	AN651_10800	95.0	84.0	XARJCFBP7179_RS12845	91.0	85.0	GW16_RS02110	92.0	86.0	J123_RS12130	91.0	85.0	X783_RS0112600	93.0	84.0	XARJCFBP7634_RS11540	91.0	85.0	XARJCFBP7651_RS19020	91.0	86.0
	XAC4252	Xanthomonas citri subsp. citri 306	Silva et al. 2002	xynB	Xylanase	-	-	-	-	-	-	-	-	-	-	-	-	-	-	-	-	-	-	-	-	-	-	-	-	-	-	-
	XAC4254	Xanthomonas citri subsp. citri 306	Silva et al. 2002	xynB	Xylanase	DK27_22320	96.0	83.0	AN652_16930	96.0	83.0	AN651_12885	96.0	85.0	XARJCFBP7179_RS14365	96.0	84.0	GW16_RS11340	96.0	85.0	J123_RS19885	96.0	84.0	X783_RS0100610	96.0	86.0	XARJCFBP7634_RS20455	87.0	90.0	XARJCFBP7651_RS20885	96.0	85.0
	XCC0857	Xanthomonas campestris pv. campestris ATCC33913	Silva et al. 2002	-	Xylanase	-	-	-	-	-	-	-	-	-	-	-	-	-	-	-	-	-	-	-	-	-	-	-	-	-	-	-
	XCC3038	Xanthomonas campestris pv. campestris ATCC33913	Silva et al. 2002	xynB	Xylanase	-	-	-	-	-	-	-	-	-	-	-	-	-	-	-	-	-	-	-	-	-	-	-	-	-	-	-
	XCC4115	Xanthomonas campestris pv. campestris ATCC33913	Silva et al. 2002	xynA	Xylanase	DK27_RS11990	98.0	84.0	AN652_16915	98.0	84.0	AN651_12900	98.0	84.0	XARJCFBP7179_RS14380	98.0	84.0	GW16_RS11320	94.0	83.0	J123_RS19870	98.0	85.0	X783_RS0100595	98.0	81.0	XARJCFBP7634_RS20440	98.0	85.0	XARJCFBP7651_RS20870	98.0	83.0
	XCC0149	Xanthomonas campestris pv. campestris ATCC33913	Silva et al. 2002	-	Xylosidases/arabinosidases	DK27_14715	94.0	97.0	AN652_20570	94.0	97.0	AN651_10830	94.0	97.0	XARJCFBP7179_RS12820	94.0	97.0	GW16_RS02085	94.0	97.0	J123_RS12105	94.0	97.0	X783_RS0112575	94.0	97.0	XARJCFBP7634_RS11515	94.0	97.0	XARJCFBP7651_RS19045	94.0	97.0
	XCC1178	Xanthomonas campestris pv. campestris ATCC33913	Silva et al. 2002	xylB	Xylosidases/arabinosidases	DK27_18505	99.0	83.0	-	-	-	AN651_01135	99.0	84.0	XARJCFBP7179_RS20760	99.0	83.0	GW16_RS08720	99.0	82.0	J123_RS01275	99.0	83.0	X783_RS0103305	99.0	82.0	XARJCFBP7634_RS06035	99.0	83.0	XARJCFBP7651_RS05450	99.0	83.0
	XCC1755	Xanthomonas campestris pv. campestris ATCC33913	Silva et al. 2002	xylS	Xylosidases/arabinosidases	DK27_17900	96.0	96.0	AN652_19215	96.0	96.0	AN651_02710	96.0	96.0	XARJCFBP7179_RS06050	96.0	95.0	GW16_RS11215	96.0	96.0	J123_RS21870	96.0	96.0	X783_RS0114240	96.0	96.0	XARJCFBP7634_RS03625	96.0	96.0	XARJCFBP7651_RS07930	96.0	96.0
	XCC2398	Xanthomonas campestris pv. campestris ATCC33913	Silva et al. 2002	xsa	Xylosidases/arabinosidases	DK27_22875	99.0	85.0	AN652_RS03495	99.0	85.0	-	-	-	XARJCFBP7179_RS19235	99.0	85.0	-	-	-	J123_RS15075	99.0	85.0	-	-	-	-	-	-	-	-	-
	XCC3975	Xanthomonas campestris pv. campestris ATCC33913	Silva et al. 2002	-	Xylosidases/arabinosidases	DK27_11030	95.0	88.0	AN652_01250	95.0	88.0	AN651_03725	94.0	89.0	XARJCFBP7179_RS15130	94.0	89.0	GW16_RS12205	95.0	88.0	-	-	-	X783_RS0119975	95.0	88.0	XARJCFBP7634_RS19670	94.0	89.0	XARJCFBP7651_RS20110	94.0	89.0
	XCC4064	Xanthomonas campestris pv. campestris ATCC33913	Silva et al. 2002	-	Xylosidases/arabinosidases	-	-	-	AN652_06100	99.0	82.0	AN651_09630	99.0	84.0	XARJCFBP7179_RS14655	99.0	83.0	GW16_RS12665	99.0	83.0	-	-	-	X783_RS0100315	99.0	83.0	XARJCFBP7634_RS20155	99.0	83.0	XARJCFBP7651_RS20595	99.0	83.0
	XCC4105	Xanthomonas campestris pv. campestris ATCC33913	Silva et al. 2002	xylB	Xylosidases/arabinosidases	DK27_02390	96.0	84.0	AN652_16860	96.0	84.0	AN651_08330	96.0	85.0	XARJCFBP7179_RS14445	94.0	83.0	GW16_RS11255	94.0	84.0	J123_RS19805	94.0	84.0	X783_RS0100535	94.0	84.0	XARJCFBP7634_RS20370	94.0	84.0	XARJCFBP7651_RS20810	94.0	84.0
	XCC4122	Xanthomonas campestris pv. campestris ATCC33913	Silva et al. 2002	-	Xylosidases/arabinosidases	DK27_22300	99.0	92.0	AN652_16950	99.0	92.0	AN651_12865	99.0	90.0	XARJCFBP7179_RS14345	99.0	92.0	GW16_RS11360	99.0	91.0	J123_RS19905	99.0	90.0	X783_RS0100630	99.0	91.0	XARJCFBP7634_RS20475	99.0	92.0	XARJCFBP7651_RS20905	99.0	91.0
lipase	XCC3451	Xanthomonas campestris pv. campestris ATCC33913	Subramoni et al. 2010	lipA	lipase	DK27_18165	97.0	98.0	AN652_02365	97.0	98.0	AN651_10065	97.0	98.0	XARJCFBP7179_RS01765	97.0	98.0	GW16_RS18240	97.0	97.0	J123_RS03870	97.0	98.0	X783_RS0113680	97.0	98.0	XARJCFBP7634_RS08890	97.0	97.0	XARJCFBP7651_RS02700	97.0	98.0
	PD1703	Xylella fastidiosa	Nascimento et al. 2016	lesA	lipase	DK27_RS16365	99.0	68.0	AN652_RS13950	99.0	68.0	AN651_RS14190	99.0	68.0	XARJCFBP7179_RS02645	99.0	68.0	GW16_RS04280	99.0	68.0	-	-	-	X783_RS0103940	99.0	68.0	-	-	-	XARJCFBP7651_RS01790	99.0	68.0
Quorum sensing	XCC4014	Xanthomonas campestris pv. campestris ATCC33913	He & Zhang 2008	rapK	pteridine-dependent deoxygenase like protein	DK27_17425	99.0	94.0	AN652_12935	99.0	94.0	AN651_18520	99.0	95.0	XARJCFBP7179_RS14930	99.0	94.0	GW16_RS12405	99.0	94.0	J123_RS14225	99.0	94.0	X783_RS0100045	99.0	95.0	XARJCFBP7634_RS19875	99.0	95.0	XARJCFBP7651_RS20310	99.0	95.0
	XCC1860	Xanthomonas campestris pv. campestris ATCC33913	He & Zhang 2008	rpfA	aconitate hydratase	DK27_09625	95.0	95.0	AN652_03020	99.0	95.0	AN651_14535	99.0	96.0	XARJCFBP7179_RS18910	99.0	96.0	GW16_RS13335	99.0	96.0	J123_RS17075	99.0	96.0	X783_RS0101085	99.0	95.0	XARJCFBP7634_RS03125	99.0	95.0	XARJCFBP7651_RS08435	99.0	95.0
	XCC1858	Xanthomonas campestris pv. campestris ATCC33913	He & Zhang 2008	rpfB	long-chain fatty acyl CoA ligase	DK27_09615	99.0	94.0	AN652_03010	99.0	94.0	AN651_14545	99.0	95.0	XARJCFBP7179_RS18920	99.0	94.0	GW16_RS13325	99.0	95.0	J123_RS17085	99.0	95.0	X783_RS0101095	99.0	95.0	XARJCFBP7634_RS03135	99.0	95.0	XARJCFBP7651_RS08425	99.0	95.0
	XAC1878	Xanthomonas citri subsp. citri 306	He & Zhang 2008	rpfC	hybrid sensor histidine kinase/response regulator	DK27_09605	86.0	86.0	AN652_03000	99.0	86.0	AN651_14555	99.0	86.0	XARJCFBP7179_RS18930	99.0	87.0	GW16_RS13315	99.0	86.0	J123_RS17095	99.0	86.0	X783_RS0101105	99.0	86.0	XARJCFBP7634_RS03145	99.0	86.0	XARJCFBP7651_RS08415	99.0	86.0
	XAC1874	Xanthomonas citri subsp. citri 306	He & Zhang 2008	rpfD	LytTR family transcriptional regulator	DK27_09585	94.0	77.0	AN652_RS02930	94.0	77.0	AN651_RS14400	94.0	78.0	XARJCFBP7179_RS18950	94.0	77.0	GW16_13760	94.0	78.0	J123_RS17115	94.0	78.0	X783_RS0101125	94.0	78.0	XARJCFBP7634_RS03165	94.0	78.0	XARJCFBP7651_RS08395	94.0	77.0
	XCC1845	Xanthomonas campestris pv. campestris ATCC33913	He & Zhang 2008	rpfE	regulatory protein	DK27_09565	87.0	87.0	AN652_02960	99.0	87.0	AN651_14595	99.0	87.0	XARJCFBP7179_RS18970	99.0	87.0	GW16_RS13275	99.0	87.0	J123_RS17135	99.0	87.0	X783_RS0101145	99.0	87.0	XARJCFBP7634_RS03185	99.0	87.0	XARJCFBP7651_RS08375	99.0	87.0
	XAC1879	Xanthomonas citri subsp. citri 306	He & Zhang 2008	rpfF	enoyl-CoA hydratase	DK27_09610	99.0	92.0	AN652_RS02955	99.0	92.0	AN651_14550	99.0	92.0	XARJCFBP7179_RS18925	99.0	91.0	GW16_RS13320	99.0	92.0	J123_RS17090	99.0	92.0	X783_RS0101100	99.0	92.0	XARJCFBP7634_RS03140	99.0	92.0	XARJCFBP7651_RS08420	99.0	92.0
	XCC1854	Xanthomonas campestris pv. campestris ATCC33913	He & Zhang 2008	rpfG	response regulator	DK27_09600	99.0	96.0	AN652_02995	99.0	96.0	AN651_14560	99.0	96.0	XARJCFBP7179_RS18935	99.0	96.0	GW16_RS13310	99.0	95.0	J123_RS17100	99.0	96.0	X783_RS0101110	99.0	96.0	XARJCFBP7634_RS03150	99.0	96.0	XARJCFBP7651_RS08410	99.0	96.0
	XCC1847	Xanthomonas campestris pv. campestris ATCC33913	He & Zhang 2008	rpfI	regulatory protein	DK27_09575	92.0	84.0	AN652_02970	92.0	84.0	AN651_14585	92.0	84.0	XARJCFBP7179_RS18960	92.0	84.0	GW16_RS13285	92.0	84.0	J123_RS17125	92.0	84.0	X783_RS0101135	92.0	84.0	XARJCFBP7634_RS03175	92.0	84.0	XARJCFBP7651_RS08385	92.0	84.0
	XAC0483	Xanthomonas citri subsp. citri 306	He & Zhang 2008	clp	cAMP-regulatory protein	DK27_20175	99	99.0	AN652_10930	99.0	99.0	AN651_14450	99.0	99.0	XARJCFBP7179_RS02730	99.0	99.0	GW16_RS04195	99.0	99.0	J123_RS04865	99.0	99.0	X783_RS0104030	99.0	99.0	XARJCFBP7634_RS09865	99.0	99.0	XARJCFBP7651_RS01705	99.0	99.0
	XCC2685	Xanthomonas campestris pv. campestris ATCC33913	He & Zhang 2008	zur	FUR family transcriptional regulator	DK27_11760	93.0	98.0	AN652_01630	93.0	98.0	AN651_19165	93.0	99.0	XARJCFBP7179_RS11875	98.0	98.0	GW16_RS17300	92.0	97.0	J123_RS08880	92.0	97.0	X783_RS0114970	92.0	97.0	XARJCFBP7634_RS13800	91.0	98.0	XARJCFBP7651_RS12605	92.0	97.0
	XCC1215	Xanthomonas campestris pv. campestris ATCC33913	He & Zhang 2008	fhrR	transcriptional regulato	-	-	-	-	-	-	-	-	-	-	-	-	GW16_RS04125	91.0	86.0	-	-	-	-	-	-	-	-	-	XARJCFBP7651_RS01635	91.0	86.0
Chemotactic proteins	XAC1903	Xanthomonas citri subsp. citri 306	Mhedbi-Hajri et al. 2011	cheA	chemotaxis protein	DK27_16815	99.0	96.0	-	-	-	AN651_18160	99.0	96.0	XARJCFBP7179_RS18795	99.0	96.0	-	-	-	-	-	-	X783_RS0100955	99.0	96.0	XARJCFBP7634_RS03025	99.0	96.0	XARJCFBP7651_RS08560	99.0	96.0
	XAC1930	Xanthomonas citri subsp. citri 306	Mhedbi-Hajri et al. 2011	cheA	chemotaxis protein	DK27_09840	99.0	94.0	AN652_21380	99.0	94.0	AN651_03560	99.0	95.0	XARJCFBP7179_RS18720	99.0	95.0	GW16_RS13535	99.0	95.0	J123_RS12425	99.0	95.0	X783_RS0100895	99.0	95.0	XARJCFBP7634_RS02945	99.0	95.0	XARJCFBP7651_RS08635	99.0	95.0
	XAC2865	Xanthomonas citri subsp. citri 306	Mhedbi-Hajri et al. 2011	cheA	chemotaxis histidine protein kinase	DK27_12925	99.0	91.0	AN652_05025	99.0	91.0	AN651_19235	99.0	91.0	XARJCFBP7179_RS11805	99.0	91.0	GW16_RS08360	99.0	91.0	J123_RS08960	99.0	91.0	-	-	-	XARJCFBP7634_RS13865	99.0	91.0	XARJCFBP7651_RS12675	99.0	91.0
	XAC1280	Xanthomonas citri subsp. citri 306	Mhedbi-Hajri et al. 2011	cheB	protein-glutamate methylesterase	DK27_RS08795	96.0	90.0	AN652_RS10215	96.0	90.0	AN651_01160	96.0	90.0	XARJCFBP7179_RS20785	96.0	90.0	GW16_RS08745	96.0	90.0	J123_RS01250	96.0	90.0	X783_RS0103280	96.0	90.0	XARJCFBP7634_RS06010	96.0	90.0	XARJCFBP7651_RS05475	98.0	89.0
	XAC1888	Xanthomonas citri subsp. citri 306	Mhedbi-Hajri et al. 2011	cheB	chemotaxis-specific methylesterase	DK27_09180	99.0	98.0	AN652_03050	99.0	98.0	AN651_14505	99.0	98.0	XARJCFBP7179_RS18880	99.0	98.0	GW16_RS13365	99.0	98.0	J123_RS17045	99.0	98.0	X783_RS0101055	99.0	98.0	XARJCFBP7634_RS03095	99.0	98.0	XARJCFBP7651_RS08465	99.0	98.0
	XAC2870	Xanthomonas citri subsp. citri 306	Mhedbi-Hajri et al. 2011	cheB	chemotaxis-specific methylesterase	DK27_12950	99.0	96.0	AN652_01570	99.0	96.0	AN651_19260	99.0	96.0	XARJCFBP7179_RS11780	96.0	99.0	GW16_RS08335	96.0	99.0	-	-	-	X783_RS0111535	96.0	99.0	XARJCFBP7634_RS13890	96.0	99.0	XARJCFBP7651_RS12700	96.0	99.0
	XAC1889	Xanthomonas citri subsp. citri 306	Mhedbi-Hajri et al. 2011	cheD	chemoreceptor glutamine deamidase CheD	DK27_09185	99.0	98.0	AN652_03055	99.0	98.0	AN651_14500	99.0	98.0	XARJCFBP7179_RS18875	99.0	98.0	GW16_RS13370	99.0	98.0	J123_RS17040	99.0	98.0	X783_RS0101050	99.0	98.0	-	-	-	XARJCFBP7651_RS08470	99.0	98.0
	XAC1281	Xanthomonas citri subsp. citri 306	Mhedbi-Hajri et al. 2011	cheR	chemotaxis protein	DK27_18475	99.0	96.0	AN652_10375	99.0	96.0	AN651_01165	99.0	96.0	XARJCFBP7179_RS20790	99.0	96.0	GW16_09060	99.0	96.0	J123_RS01245	99.0	96.0	X783_RS0103275	99.0	96.0	XARJCFBP7634_RS06005	99.0	96.0	XARJCFBP7651_RS05480	99.0	96.0
	XCV1932	Xanthomonas campestris pv. vesicatoria 85-10	Mhedbi-Hajri et al. 2011	cheR2	methylase of chemotaxis methyl-accepting proteins	DK27_09190	95.0	99.0	AN652_03060	95.0	99.0	AN651_14495	95.0	99.0	-	-	-	GW16_RS13375	95.0	99.0	J123_RS17035	95.0	98.0	X783_RS0101045	95.0	99.0	XARJCFBP7634_RS03085	99.0	98.0	-	-	-
	XAC2869	Xanthomonas citri subsp. citri 306	Mhedbi-Hajri et al. 2011	cheR	response regulator for chemotaxis	DK27_12945	97.0	96.0	AN652_01575	97.0	96.0	AN651_19255	97.0	97.0	XARJCFBP7179_RS11785	97.0	96.0	GW16_RS08340	97.0	97.0	J123_RS08980	97.0	97.0	X783_RS0111530	97.0	96.0	XARJCFBP7634_RS13885	97.0	97.0	XARJCFBP7651_RS12695	97.0	96.0
	XAC3730	Xanthomonas citri subsp. citri 306	Mhedbi-Hajri et al. 2011	cheR	methyltransferase	DK27_18955	99.0	83.0	AN652_04045	99.0	83.0	AN651_16375	99.0	83.0	XARJCFBP7179_RS16945	98.0	83.0	GW16_RS04530	98.0	83.0	J123_RS18930	98.0	83.0	X783_RS0105815	98.0	83.0	XARJCFBP7634_RS18005	98.0	83.0	XARJCFBP7651_RS16480	98.0	83.0
	XAC1987	Xanthomonas citri subsp. citri 306	Mhedbi-Hajri et al. 2011	cheV	chemotaxis protein	DK27_17510	99.0	99.0	AN652_18525	99.0	99.0	AN651_03275	99.0	99.0	XARJCFBP7179_RS18445	99.0	99.0	GW16_RS13815	99.0	99.0	J123_RS12710	99.0	99.0	X783_RS0113245	99.0	99.0	XARJCFBP7634_RS02665	99.0	99.0	XARJCFBP7651_RS08920	99.0	99.0
	XCV1935	Xanthomonas campestris pv. vesicatoria 85-10	Mhedbi-Hajri et al. 2011	cheW1	chemotaxis signal transduction protein	DK27_09205	99.0	98.0	AN652_03075	99.0	98.0	AN651_18210	99.0	98.0	XARJCFBP7179_RS18850	99.0	98.0	GW16_RS13390	99.0	98.0	J123_RS12265	99.0	98.0	X783_RS0101030	99.0	98.0	XARJCFBP7634_RS03070	99.0	98.0	XARJCFBP7651_RS08490	99.0	98.0
	XAC1906	Xanthomonas citri subsp. citri 306	Mhedbi-Hajri et al. 2011	cheW	chemotaxis protein	DK27_16830	99.0	79.0	-	-	-	AN651_18175	91.0	94.0	XARJCFBP7179_RS18780	99.0	76.0	GW16_RS13480	99.0	76.0	J123_RS12365	99.0	80.0	X783_RS0100940	99.0	76.0	-	-	-	XARJCFBP7651_RS08575	99.0	81.0
	XAC2447	Xanthomonas citri subsp. citri 306	Mhedbi-Hajri et al. 2011	cheW	chemotaxis protein	DK27_19845	99.0	96.0	AN652_01200	99.0	96.0	-	-	-	XARJCFBP7179_RS06685	99.0	96.0	GW16_RS15530	99.0	96.0	J123_RS10630	99.0	96.0	X783_RS0111090	99.0	96.0	XARJCFBP7634_RS01055	99.0	92.0	XARJCFBP7651_RS10780	99.0	95.0
	XAC2867	Xanthomonas citri subsp. citri 306	Mhedbi-Hajri et al. 2011	cheW	chemotaxis protein	DK27_12935	86.0	90.0	AN652_01585	86.0	90.0	AN651_19245	86.0	91.0	XARJCFBP7179_RS11795	86.0	91.0	GW16_08655	88.0	88.0	J123_RS08970	88.0	88.0	X783_RS0111520	86.0	91.0	XARJCFBP7634_RS13875	85.0	91.0	XARJCFBP7651_RS12685	86.0	91.0
	XCC1905	Xanthomonas campestris pv. campestris ATCC33913	Mhedbi-Hajri et al. 2011	cheY	chemotaxis protein	DK27_RS20225	99.0	99.0	AN652_RS21115	99.0	99.0	AN651_RS03515	99.0	99.0	XARJCFBP7179_RS18710	99.0	99.0	GW16_RS13545	99.0	99.0	J123_RS12435	99.0	99.0	X783_RS0100885	99.0	99.0	XARJCFBP7634_RS02935	99.0	99.0	XARJCFBP7651_RS08645	99.0	99.0
	XAC1931	Xanthomonas citri subsp. citri 306	Mhedbi-Hajri et al. 2011	cheZ	chemotaxis protein	DK27_09835	93.0	96.0	AN652_21385	93.0	96.0	AN651_03555	93.0	96.0	XARJCFBP7179_RS18715	93.0	96.0	GW16_RS13540	93.0	96.0	J123_RS12430	93.0	96.0	X783_RS0100890	93.0	96.0	XARJCFBP7634_RS02940	93.0	94.0	-	-	-
Flagellar components	XAC1908	Xanthomonas citri subsp. citri 306	Mhedbi-Hajri et al. 2011	motB	flagellar motor protein MotD	DK27_16840	99.0	94.0	AN652_13625	99.0	94.0	AN651_18185	99.0	94.0	XARJCFBP7179_RS18770	99.0	94.0	GW16_RS13490	99.0	94.0	J123_RS12375	99.0	94.0	X783_RS0100930	99.0	94.0	XARJCFBP7634_RS03000	99.0	94.0	XARJCFBP7651_RS08585	99.0	94.0
	XAC1909	Xanthomonas citri subsp. citri 306	Mhedbi-Hajri et al. 2011	motC	flagellar motor protein	DK27_16845	99.0	98.0	AN652_13630	99.0	98.0	AN651_18190	99.0	98.0	XARJCFBP7179_RS18765	99.0	98.0	GW16_RS13495	99.0	98.0	J123_RS12380	99.0	98.0	X783_RS0100925	99.0	98.0	XARJCFBP7634_RS02995	99.0	98.0	XARJCFBP7651_RS08590	99.0	98.0
	XAC1935	Xanthomonas citri subsp. citri 306	Mhedbi-Hajri et al. 2011	flhF	flagellar biosynthesis regulator FlhF	DK27_RS20210	-	-	AN652_21405	-	-	AN651_03535	84.0	99.0	XARJCFBP7179_RS18695	84.0	99.0	GW16_RS13560	84.0	99.0	J123_RS12450	84.0	99.0	X783_RS0100870	84.0	99.0	XARJCFBP7634_RS02920	84.0	99.0	XARJCFBP7651_RS08660	84.0	99.0
	XAC1936	Xanthomonas citri subsp. citri 306	Mhedbi-Hajri et al. 2011	flhA	flagellar biosynthesis protein FlhA	DK27_RS20205	99.0	97.0	AN652_RS10785	99.0	97.0	AN651_RS03495	99.0	97.0	XARJCFBP7179_RS18690	99.0	97.0	GW16_14045	96.0	97.0	J123_RS12455	99.0	97.0	X783_RS0100865	99.0	97.0	XARJCFBP7634_RS02915	99.0	97.0	XARJCFBP7651_RS08665	99.0	97.0
	XAC1937	Xanthomonas citri subsp. citri 306	Mhedbi-Hajri et al. 2011	flhB	flagellar biosynthesis protein FlhB	DK27_09805	99.0	98.0	AN652_10955	99.0	98.0	AN651_RS03490	-	-	XARJCFBP7179_RS18685	99.0	97.0	-	-	-	J123_RS12460	99.0	98.0	X783_RS0100860	99.0	97.0	XARJCFBP7634_RS02910	99.0	97.0	XARJCFBP7651_RS08670	99.0	97.0
	XAC1941	Xanthomonas citri subsp. citri 306	Mhedbi-Hajri et al. 2011	fliR	flagellar biosynthetic protein	DK27_09785	99.0	96.0	AN652_10975	99.0	96.0	AN651_03510	99.0	96.0	XARJCFBP7179_RS18665	99.0	96.0	GW16_RS13590	99.0	96.0	J123_RS12480	99.0	96.0	X783_RS0100845	99.0	96.0	XARJCFBP7634_RS02890	99.0	96.0	XARJCFBP7651_RS08690	99.0	96.0
	XAC1942	Xanthomonas citri subsp. citri 306	Mhedbi-Hajri et al. 2011	fliQ	flagellar biosynthesis	DK27_RS20175	98.0	100.0	AN652_RS10815	98.0	100.0	AN651_RS03470	98.0	100.0	XARJCFBP7179_RS18660	98.0	100.0	GW16_RS13595	98.0	100.0	J123_RS12485	98.0	100.0	X783_RS0100840	98.0	100.0	XARJCFBP7634_RS02885	98.0	100.0	XARJCFBP7651_RS08695	98.0	100.0
	XAC1944	Xanthomonas citri subsp. citri 306	Mhedbi-Hajri et al. 2011	fliP	flagellar biosynthesis protein FliP	DK27_09775	86.0	99.0	AN652_10985	86.0	99.0	AN651_03500	86.0	99.0	XARJCFBP7179_RS18655	86.0	99.0	GW16_RS13600	86.0	99.0	J123_RS12490	86.0	99.0	X783_RS0100835	86.0	99.0	XARJCFBP7634_RS02880	86.0	99.0	XARJCFBP7651_RS08700	86.0	99.0
	XAC1945	Xanthomonas citri subsp. citri 306	Chevance & Hughes 2008	fliO	flagellar protein	DK27_09770	99.0	95.0	AN652_10990	99.0	95.0	AN651_03495	99.0	95.0	XARJCFBP7179_RS18650	98.0	96.0	GW16_RS13605	99.0	96.0	J123_RS12495	99.0	96.0	X783_RS0100830	99.0	96.0	XARJCFBP7634_RS02875	99.0	96.0	XARJCFBP7651_RS08705	99.0	96.0
	XAC1946	Xanthomonas citri subsp. citri 306	Chevance & Hughes 2008	fliN	flagellar protein	-	-	-	-	-	-	-	-	-	-	-	-	-	-	-	-	-	-	-	-	-	-	-	-	-	-	-
	XAC1947	Xanthomonas citri subsp. citri 306	Mhedbi-Hajri et al. 2011	fliM	flagellar motor switch protein FliM	DK27_RS20155	99.0	99.0	AN652_RS10835	-	-	AN651_03485	99.0	99.0	XARJCFBP7179_RS18640	99.0	99.0	GW16_RS13615	99.0	99.0	J123_RS12505	99.0	99.0	X783_RS0100820	99.0	99.0	XARJCFBP7634_RS02865	99.0	99.0	XARJCFBP7651_RS08715	99.0	99.0
	XAC1948	Xanthomonas citri subsp. citri 306	Chevance & Hughes 2008	fliL	flagellar protein	-	-	-	-	-	-	-	-	-	-	-	-	-	-	-	-	-	-	-	-	-	-	-	-	-	-	-
	XAC1949	Xanthomonas citri subsp. citri 306	Mhedbi-Hajri et al. 2011	fliK	flagellar protein	-	-	-	-	-	-	-	-	-	-	-	-	-	-	-	-	-	-	-	-	-	-	-	-	-	-	-
	XAC1950	Xanthomonas citri subsp. citri 306	Chevance & Hughes 2008	fliJ	flagellar FliJ protein	DK27_09745	99.0	93.0	AN652_21080	99.0	93.0	AN651_03470	99.0	95.0	XARJCFBP7179_RS18625	99.0	93.0	GW16_RS13630	99.0	93.0	J123_RS12520	99.0	93.0	-	-	-	XARJCFBP7634_RS02850	99.0	93.0	XARJCFBP7651_RS08730	99.0	93.0
	XAC1951	Xanthomonas citri subsp. citri 306	Mhedbi-Hajri et al. 2011	fliI	flagellar protein	DK27_RS20135	99.0	97.0	AN652_RS20810	99.0	97.0	AN651_03465	99.0	98.0	XARJCFBP7179_RS18620	99.0	97.0	GW16_RS13635	99.0	97.0	J123_RS12525	99.0	97.0	X783_RS0113050	90.0	98.0	XARJCFBP7634_RS02845	99.0	97.0	XARJCFBP7651_RS08735	99.0	97.0
	XAC1952	Xanthomonas citri subsp. citri 306	Mhedbi-Hajri et al. 2011	fliH	flagellar protein	DK27_RS20130	-	-	AN652_RS20815	99.0	92.0	AN651_RS03425	99.0	92.0	XARJCFBP7179_RS18615	99.0	93.0	GW16_RS13640	99.0	93.0	J123_RS12530	99.0	92.0	X783_RS0113055	99.0	92.0	XARJCFBP7634_RS02840	99.0	93.0	XARJCFBP7651_RS08740	99.0	93.0
	XAC1953	Xanthomonas citri subsp. citri 306	Mhedbi-Hajri et al. 2011	fliG	flagellar protein	DK27_RS20125	97.0	99.0	AN652_RS20820	97.0	99.0	AN651_RS03420	97.0	99.0	XARJCFBP7179_RS18610	97.0	99.0	GW16_RS13645	97.0	99.0	J123_RS12535	97.0	99.0	X783_RS0113060	97.0	99.0	XARJCFBP7634_RS02835	97.0	99.0	XARJCFBP7651_RS08745	97.0	99.0
	XAC1954	Xanthomonas citri subsp. citri 306	Mhedbi-Hajri et al. 2011	fliF	flagellar MS-ring protein	DK27_RS20120	-	-	AN652_RS20825	-	-	AN651_03450	99.0	93.0	XARJCFBP7179_RS18605	99.0	93.0	GW16_RS13650	99.0	93.0	J123_RS12540	99.0	93.0	X783_RS0113065	99.0	93.0	XARJCFBP7634_RS02830	99.0	93.0	XARJCFBP7651_RS08750	99.0	93.0
	XAC1955	Xanthomonas citri subsp. citri 306	Mhedbi-Hajri et al. 2011	fliE	flagellar protein	DK27_RS20115	99.0	96.0	AN652_RS10280	99.0	96.0	AN651_03445	99.0	96.0	XARJCFBP7179_RS18600	99.0	96.0	GW16_RS13655	99.0	96.0	J123_RS12545	99.0	96.0	X783_RS0113070	99.0	96.0	XARJCFBP7634_RS02825	99.0	96.0	XARJCFBP7651_RS08755	99.0	96.0
	XAC1973	Xanthomonas citri subsp. citri 306	Mhedbi-Hajri et al. 2011	fliS	flagellar protein	DK27_19555	99.0	96.0	AN652_07795	99.0	96.0	AN651_03345	99.0	96.0	XARJCFBP7179_RS18515	99.0	96.0	GW16_RS13745	99.0	96.0	J123_RS12635	99.0	97.0	X783_RS0113175	99.0	97.0	XARJCFBP7634_RS02735	99.0	97.0	XARJCFBP7651_RS08850	99.0	97.0
	XAC1974	Xanthomonas citri subsp. citri 306	Mhedbi-Hajri et al. 2011	fliD	flagellar protein	DK27_19550	96.0	94.0	AN652_RS07670	96.0	94.0	-	-	-	XARJCFBP7179_RS18510	96.0	94.0	GW16_RS13750	96.0	90.0	J123_RS12640	96.0	94.0	X783_RS0113180	96.0	94.0	XARJCFBP7634_RS02730	96.0	89.0	XARJCFBP7651_RS08855	96.0	90.0
	XAC1975	Xanthomonas citri subsp. citri 306	Mhedbi-Hajri et al. 2011	fliC	flagellin	DK27_19545	99.0	86.0	AN652_07785	99.0	86.0	AN651_03335	99.0	90.0	XARJCFBP7179_RS18505	99.0	86.0	GW16_RS13755	99.0	90.0	J123_RS12645	99.0	86.0	X783_RS0113185	99.0	90.0	XARJCFBP7634_RS02725	99.0	90.0	XARJCFBP7651_RS08860	99.0	90.0
	XAC1976	Xanthomonas citri subsp. citri 306	Mhedbi-Hajri et al. 2011	flgL	flagellar hook-associated protein FlgL	DK27_19540	99.0	95.0	AN652_07780	99.0	95.0	AN651_03330	99.0	94.0	XARJCFBP7179_RS18500	99.0	94.0	GW16_RS13760	99.0	95.0	J123_RS12650	99.0	95.0	X783_RS0113190	99.0	95.0	XARJCFBP7634_RS02720	99.0	95.0	XARJCFBP7651_RS08865	99.0	95.0
	XAC1977	Xanthomonas citri subsp. citri 306	Mhedbi-Hajri et al. 2011	flgK	flagellar hook-associated protein FlgK	DK27_19535	99.0	95.0	AN652_07775	99.0	95.0	AN651_03325	99.0	95.0	XARJCFBP7179_RS18495	99.0	94.0	GW16_RS13765	99.0	94.0	J123_RS12655	99.0	94.0	X783_RS0113195	99.0	95.0	XARJCFBP7634_RS02715	99.0	94.0	XARJCFBP7651_RS08870	99.0	94.0
	XAC1978	Xanthomonas citri subsp. citri 306	Mhedbi-Hajri et al. 2011	flgJ	flagellar rod assembly protein/muramidase FlgJ	DK27_RS09805	-	-	AN652_07770	99.0	94.0	AN651_03320	99.0	94.0	XARJCFBP7179_RS18490	99.0	94.0	GW16_RS13770	99.0	95.0	-	-	-	X783_RS0113200	99.0	94.0	XARJCFBP7634_RS02710	99.0	95.0	XARJCFBP7651_RS08875	99.0	95.0
	XAC1979	Xanthomonas citri subsp. citri 306	Mhedbi-Hajri et al. 2011	flgI	flagellar basal body P-ring biosynthesis protein FlgA	DK27_RS09800	-	-	AN652_07765	99.0	98.0	AN651_03315	99.0	99.0	XARJCFBP7179_RS18485	99.0	99.0	GW16_RS13775	99.0	99.0	-	-	-	-	-	-	XARJCFBP7634_RS02705	99.0	99.0	XARJCFBP7651_RS08880	99.0	99.0
	XAC1980	Xanthomonas citri subsp. citri 306	Mhedbi-Hajri et al. 2011	flgH	flagellar basal body L-ring protein	DK27_RS09795	99.0	97.0	AN652_RS07640	99.0	97.0	AN651_03310	99.0	97.0	XARJCFBP7179_RS18480	99.0	97.0	GW16_RS13780	99.0	97.0	J123_RS12675	99.0	97.0	X783_RS0113210	99.0	97.0	XARJCFBP7634_RS02700	99.0	97.0	XARJCFBP7651_RS08885	99.0	97.0
	XAC1981	Xanthomonas citri subsp. citri 306	Mhedbi-Hajri et al. 2011	flgG	flagellar basal body rod protein FlgG	DK27_19515	99.0	99.0	AN652_07755	99.0	99.0	AN651_03305	99.0	99.0	XARJCFBP7179_RS18475	99.0	99.0	GW16_RS13785	99.0	99.0	J123_RS12680	99.0	99.0	X783_RS0113215	99.0	99.0	XARJCFBP7634_RS02695	99.0	98.0	XARJCFBP7651_RS08890	99.0	99.0
	XAC1982	Xanthomonas citri subsp. citri 306	Mhedbi-Hajri et al. 2011	flgF	flagellar basal body rod protein FlgF	DK27_RS07895	-	-	AN652_RS18250	99.0	100.0	AN651_RS03265	99.0	100.0	XARJCFBP7179_RS18470	99.0	100.0	GW16_RS13790	99.0	100.0	J123_RS12685	99.0	100.0	X783_RS0113220	99.0	100.0	XARJCFBP7634_RS02690	99.0	100.0	XARJCFBP7651_RS08895	99.0	100.0
	XAC1983	Xanthomonas citri subsp. citri 306	Mhedbi-Hajri et al. 2011	flgE	flagellar hook protein FlgE	DK27_RS07890	-	-	AN652_18505	99.0	98.0	AN651_03295	99.0	98.0	XARJCFBP7179_RS18465	99.0	98.0	GW16_RS13795	99.0	98.0	J123_RS12690	99.0	98.0	X783_RS0113225	99.0	98.0	XARJCFBP7634_RS02685	99.0	98.0	XARJCFBP7651_RS08900	99.0	98.0
	XAC1984	Xanthomonas citri subsp. citri 306	Mhedbi-Hajri et al. 2011	flgD	flagellar basal body rod modification protein	DK27_17525	99.0	90.0	AN652_18510	99.0	90.0	AN651_03290	99.0	90.0	XARJCFBP7179_RS18460	99.0	90.0	GW16_RS13800	99.0	90.0	J123_RS12695	99.0	90.0	X783_RS0113230	99.0	90.0	XARJCFBP7634_RS02680	99.0	90.0	XARJCFBP7651_RS08905	99.0	90.0
	XAC1985	Xanthomonas citri subsp. citri 306	Mhedbi-Hajri et al. 2011	flgC	flagellar basal body rod protein FlgC	DK27_17520	99.0	99.0	AN652_18515	99.0	99.0	AN651_03285	99.0	99.0	XARJCFBP7179_RS18455	99.0	99.0	GW16_RS13805	99.0	99.0	J123_RS12700	99.0	99.0	X783_RS0113235	99.0	99.0	XARJCFBP7634_RS02675	99.0	99.0	XARJCFBP7651_RS08910	99.0	99.0
	XAC1986	Xanthomonas citri subsp. citri 306	Mhedbi-Hajri et al. 2011	flgB	flagellar basal-body rod protein FlgB	DK27_17515	99.0	89.0	AN652_18520	99.0	89.0	AN651_03280	99.0	89.0	XARJCFBP7179_RS18450	99.0	89.0	GW16_RS13810	99.0	89.0	J123_RS12705	99.0	89.0	X783_RS0113240	99.0	89.0	XARJCFBP7634_RS02670	99.0	89.0	XARJCFBP7651_RS08915	99.0	89.0
	XAC1988	Xanthomonas citri subsp. citri 306	Mhedbi-Hajri et al. 2011	flgA	flagellar basal body P-ring biosynthesis protein FlgA	DK27_17505	91.0	97.0	AN652_18530	91.0	97.0	AN651_03270	91.0	97.0	XARJCFBP7179_RS18440	91.0	97.0	GW16_RS13820	91.0	97.0	J123_RS12715	91.0	97.0	X783_RS0113250	91.0	98.0	XARJCFBP7634_RS02660	91.0	97.0	XARJCFBP7651_RS08925	91.0	98.0
	XAC1989	Xanthomonas citri subsp. citri 306	Chevance & Hughes 2008	flgM	flagellar protein	DK27_17500	99.0	94.0	AN652_18535	99.0	94.0	AN651_03265	99.0	95.0	XARJCFBP7179_RS18435	99.0	95.0	GW16_RS13825	99.0	95.0	J123_RS12720	99.0	95.0	X783_RS0113255	99.0	95.0	XARJCFBP7634_RS02655	99.0	95.0	XARJCFBP7651_RS08930	99.0	95.0
	XAC3693	Xanthomonas citri subsp. citri 306	Mhedbi-Hajri et al. 2011	motA	flagellar motor protein MotA	DK27_07235	93.0	96.0	AN652_16155	93.0	96.0	AN651_14070	93.0	97.0	XARJCFBP7179_RS17115	93.0	96.0	GW16_RS04735	93.0	97.0	J123_RS18760	79.0	96.0	X783_RS0117250	93.0	97.0	XARJCFBP7634_RS17850	93.0	97.0	XARJCFBP7651_RS16325	93.0	97.0
	XAC3694	Xanthomonas citri subsp. citri 306	Mhedbi-Hajri et al. 2011	motB	flagellar motor protein MotB	DK27_07240	81.0	95.0	-	-	-	AN651_14075	81.0	95.0	-	-	-	GW16_RS04730	81.0	95.0	J123_RS18775	81.0	95.0	X783_RS0117255	81.0	95.0	XARJCFBP7634_RS17855	81.0	95.0	XARJCFBP7651_RS16330	81.0	95.0
	XFF4834R_chr20920	Xanthomonas fuscans subsp. Fuscans 4834-R	Chevance & Hughes 2008	flgN	flagella synthesis protein FlgN	DK27_17495	99.0	96.0	AN652_18540	99.0	96.0	AN651_03260	99.0	98.0	XARJCFBP7179_RS18430	99.0	97.0	GW16_RS13830	99.0	97.0	J123_RS12725	99.0	97.0	X783_RS0113260	99.0	98.0	XARJCFBP7634_RS02650	99.0	98.0	XARJCFBP7651_RS08935	99.0	98.0
Type IV pilus biogenesis and fimbrial adhesins	XAC0258	Xanthomonas citri subsp. citri 306	Dunger et al. 2016	-	hypothetical protein	DK27_RS15805	98.0	91.0	AN652_RS08040	98.0	91.0	AN651_RS11165	98.0	92.0	XARJCFBP7179_RS04030	98.0	92.0	GW16_RS01585	98.0	92.0	J123_RS11470	98.0	92.0	X783_RS0109405	99.0	91.0	XARJCFBP7634_RS11020	98.0	92.0	XARJCFBP7651_RS00320	98.0	92.0
	XAC0259	Xanthomonas citri subsp. citri 306	Dunger et al. 2016	-	hypothetical protein	DK27_RS15800	99.0	82.0	AN652_RS08045	99.0	82.0	AN651_RS11170	99.0	82.0	XARJCFBP7179_RS04025	99.0	82.0	-	-	-	J123_RS11465	99.0	82.0	X783_RS0109400	99.0	82.0	-	-	-	-	-	-
	XAC1133	Xanthomonas citri subsp. citri 306	Dunger et al. 2016	pilZ	type IV fimbriae assembly protein	DK27_RS18695	99.0	97.0	AN652_RS15720	99.0	97.0	AN651_RS00380	99.0	97.0	XARJCFBP7179_RS10000	99.0	98.0	GW16_RS20205	99.0	98.0	J123_RS01795	99.0	97.0	X783_RS0105725	99.0	97.0	XARJCFBP7634_RS06800	99.0	98.0	XARJCFBP7651_RS04650	99.0	97.0
	XAC2017	Xanthomonas citri subsp. citri 306	Dunger et al. 2016	pilF	fimbrial biogenesis protein	DK27_RS03175	99.0	88.0	AN652_RS11045	99.0	88.0	AN651_RS01340	99.0	88.0	XARJCFBP7179_RS18295	99.0	89.0	GW16_RS13965	99.0	89.0	J123_RS12860	99.0	88.0	X783_RS0116330	99.0	88.0	-	-	-	XARJCFBP7651_RS09070	99.0	88.0
	XAC2398	Xanthomonas citri subsp. citri 306	Dunger et al. 2016	fimX	hypothetical protein	DK27_RS00745	99.0	94.0	AN652_RS01080	99.0	94.0	AN651_RS16885	99.0	94.0	XARJCFBP7179_RS06785	99.0	94.0	GW16_RS15435	99.0	94.0	J123_RS10530	99.0	94.0	X783_RS0111190	99.0	94.0	XARJCFBP7634_RS01150	99.0	94.0	XARJCFBP7651_RS10680	99.0	94.0
	XAC2664	Xanthomonas citri subsp. citri 306	Dunger et al. 2016	pilE	PilE protein	-	-	-	-	-	-	-	-	-	-	-	-	-	-	-	-	-	-	-	-	-	-	-	-	-	-	-
	XAC2665	Xanthomonas citri subsp. citri 306	Dunger et al. 2016	pilY1	PilY1 protein	-	-	-	-	-	-	-	-	-	-	-	-	-	-	-	-	-	-	-	-	-	-	-	-	-	-	-
	XAC2666	Xanthomonas citri subsp. citri 306	Dunger et al. 2016	pilX	PilX protein	-	-	-	-	-	-	-	-	-	-	-	-	-	-	-	-	-	-	-	-	-	-	-	-	-	-	-
	XAC2667	Xanthomonas citri subsp. citri 306	Dunger et al. 2016	pilW	pre-pilin leader sequence	-	-	-	-	-	-	-	-	-	-	-	-	-	-	-	-	-	-	-	-	-	-	-	-	-	-	-
	XAC2668	Xanthomonas citri subsp. citri 306	Dunger et al. 2016	pilV	pre-pilin leader sequence	-	-	-	-	-	-	-	-	-	-	-	-	-	-	-	-	-	-	-	-	-	-	-	-	-	-	-
	XAC2669	Xanthomonas citri subsp. citri 306	Dunger et al. 2016	fimT	pre-pilin like leader sequence	-	-	-	-	-	-	-	-	-	-	-	-	-	-	-	-	-	-	-	-	-	-	-	-	-	-	-
	XAC2923	Xanthomonas citri subsp. citri 306	Dunger et al. 2016	pilU	twitching motility protein	DK27_RS13825	99.0	98.0	AN652_RS01340	99.0	98.0	AN651_RS05660	99.0	98.0	XARJCFBP7179_RS11580	99.0	98.0	GW16_RS08130	99.0	98.0	J123_RS09215	99.0	98.0	X783_RS0120105	99.0	98.0	XARJCFBP7634_RS14090	99.0	98.0	XARJCFBP7651_RS12900	99.0	98.0
	XAC2924	Xanthomonas citri subsp. citri 306	Dunger et al. 2016	pilT	twitching motility protein	DK27_RS13820	99.0	100.0	AN652_RS01335	99.0	100.0	AN651_RS05665	99.0	100.0	XARJCFBP7179_RS11575	99.0	100.0	GW16_RS08125	99.0	100.0	J123_RS09220	99.0	100.0	X783_RS0120100	99.0	100.0	XARJCFBP7634_RS14095	99.0	100.0	XARJCFBP7651_RS12905	99.0	99.0
	XAC3098	Xanthomonas citri subsp. citri 306	Dunger et al. 2016	pilL	PilL protein	DK27_06150	90.0	81.0	AN652_RS13200	90.0	81.0	AN651_01740	90.0	81.0	XARJCFBP7179_RS10810	90.0	82.0	GW16_RS07355	90.0	81.0	J123_RS19670	90.0	81.0	X783_RS0117490	84.0	82.0	XARJCFBP7634_RS14850	90.0	82.0	XARJCFBP7651_RS13710	90.0	82.0
	XAC3099	Xanthomonas citri subsp. citri 306	Dunger et al. 2016	pilJ	pilus biogenesis protein	DK27_RS17980	99.0	98.0	AN652_RS13205	99.0	98.0	AN651_RS01730	99.0	98.0	XARJCFBP7179_RS10805	99.0	98.0	GW16_RS07350	99.0	98.0	J123_RS19665	99.0	97.0	X783_RS0117495	99.0	98.0	XARJCFBP7634_RS14855	99.0	98.0	XARJCFBP7651_RS13715	99.0	98.0
	XAC3100	Xanthomonas citri subsp. citri 306	Dunger et al. 2016	pilI	pilus biogenesis protein	DK27_RS17975	98.0	99.0	AN652_RS13210	98.0	99.0	AN651_RS01735	98.0	99.0	XARJCFBP7179_RS10800	98.0	99.0	GW16_RS07345	98.0	99.0	J123_RS19660	98.0	99.0	X783_RS0117500	98.0	99.0	XARJCFBP7634_RS14860	98.0	99.0	XARJCFBP7651_RS13720	98.0	99.0
	XAC3101	Xanthomonas citri subsp. citri 306	Dunger et al. 2016	pilH	PilH protein	DK27_RS17970	99.0	97.0	AN652_RS13215	99.0	97.0	AN651_RS01740	99.0	97.0	XARJCFBP7179_RS10795	99.0	97.0	GW16_RS07340	99.0	97.0	J123_RS19655	99.0	97.0	X783_RS0117505	99.0	97.0	XARJCFBP7634_RS14865	99.0	97.0	XARJCFBP7651_RS13725	99.0	97.0
	XAC3102	Xanthomonas citri subsp. citri 306	Dunger et al. 2016	pilG	pilus protein	DK27_RS17965	99.0	99.0	AN652_RS13220	99.0	99.0	AN651_RS01745	99.0	99.0	XARJCFBP7179_RS10790	99.0	99.0	GW16_RS07335	99.0	99.0	J123_RS19650	99.0	99.0	X783_RS0117510	99.0	99.0	XARJCFBP7634_RS14870	99.0	99.0	XARJCFBP7651_RS13730	99.0	99.0
	XAC3237	Xanthomonas citri subsp. citri 306	Dunger et al. 2016	pilS	two-component system sensor protein	DK27_RS19260	99.0	92.0	AN652_RS05690	99.0	92.0	AN651_RS12355	99.0	92.0	XARJCFBP7179_RS10235	99.0	93.0	GW16_RS06770	99.0	92.0	J123_RS06615	99.0	92.0	X783_RS0111830	99.0	92.0	XARJCFBP7634_RS15430	99.0	92.0	XARJCFBP7651_RS14280	99.0	92.0
	XAC3238	Xanthomonas citri subsp. citri 306	Dunger et al. 2016	pilR	two-component system regulatory protein	DK27_RS19255	95.0	97.0	AN652_RS05695	95.0	97.0	AN651_11135	98.0	40.0	XARJCFBP7179_RS10230	95.0	98.0	GW16_RS06765	95.0	98.0	J123_RS06610	95.0	98.0	X783_RS0111820	95.0	97.0	XARJCFBP7634_RS15435	95.0	98.0	XARJCFBP7651_RS14285	95.0	98.0
	XAC3239	Xanthomonas citri subsp. citri 306	Dunger et al. 2016	pilB	pilus biogenesis protein	DK27_RS16990	99.0	96.0	AN652_05790	71.0	100.0	AN651_RS12345	99.0	96.0	XARJCFBP7179_RS10225	99.0	96.0	GW16_RS06760	99.0	96.0	J123_RS06605	91.0	96.0	X783_RS0111815	99.0	94.0	XARJCFBP7634_RS15440	99.0	96.0	XARJCFBP7651_RS14290	99.0	96.0
	XAC3240	Xanthomonas citri subsp. citri 306	Dunger et al. 2016	pilA	prepilin	-	-	-	-	-	-	-	-	-	-	-	-	-	-	-	-	-	-	-	-	-	-	-	-	-	-	-
	XAC3241	Xanthomonas citri subsp. citri 306	Dunger et al. 2016	pilA	prepilin	-	-	-	-	-	-	-	-	-	-	-	-	GW16_RS06750	99.0	88.0	-	-	-	-	-	-	-	-	-	-	-	-
	XAC3242	Xanthomonas citri subsp. citri 306	Dunger et al. 2016	pilC	fimbrial assembly protein	DK27_RS16980	99.0	90.0	AN6AN652_RS1871052_18960	99.0	90.0	AN651_RS12320	99.0	86.0	XARJCFBP7179_RS10215	99.0	89.0	GW16_RS06745	99.0	96.0	J123_RS06590	99.0	88.0	X783_RS0111805	99.0	88.0	XARJCFBP7634_RS15470	99.0	90.0	XARJCFBP7651_RS14300	99.0	89.0
	XAC3243	Xanthomonas citri subsp. citri 306	Dunger et al. 2016	pilD	type IV pre-pilin leader peptidase	DK27_RS16975	99.0	99.0	AN652_RS18715	99.0	99.0	AN651_RS12315	99.0	99.0	XARJCFBP7179_RS10210	99.0	99.0	GW16_RS06740	99.0	98.0	J123_RS06585	99.0	99.0	X783_RS0111800	99.0	99.0	XARJCFBP7634_RS15475	99.0	99.0	XARJCFBP7651_RS14305	99.0	99.0
	XAC3381	Xanthomonas citri subsp. citri 306	Dunger et al. 2016	pilQ	fimbrial assembly protein	DK27_RS18550	99.0	95.0	AN652_RS17090	99.0	95.0	AN651_RS11875	99.0	86.0	XARJCFBP7179_RS09220	99.0	86.0	GW16_RS06305	99.0	95.0	J123_RS06110	99.0	86.0	-	-	-	XARJCFBP7634_RS16025	99.0	86.0	XARJCFBP7651_RS14730	99.0	85.0
	XAC3382	Xanthomonas citri subsp. citri 306	Dunger et al. 2016	pilP	fimbrial assembly protein	DK27_RS18545	99.0	97.0	AN652_RS17095	99.0	97.0	AN651_RS11870	99.0	97.0	XARJCFBP7179_RS09215	99.0	97.0	GW16_RS06300	99.0	97.0	J123_RS06105	99.0	97.0	X783_RS0103625	99.0	98.0	XARJCFBP7634_RS16030	99.0	98.0	XARJCFBP7651_RS14735	99.0	97.0
	XAC3383	Xanthomonas citri subsp. citri 306	Dunger et al. 2016	pilO	fimbrial assembly membrane protein	DK27_RS18540	99.0	97.0	AN652_RS17100	99.0	97.0	AN651_RS11865	99.0	96.0	XARJCFBP7179_RS09210	99.0	97.0	GW16_RS06295	99.0	97.0	J123_RS06100	99.0	97.0	X783_RS0103620	99.0	96.0	XARJCFBP7634_RS16035	99.0	96.0	XARJCFBP7651_RS14740	99.0	97.0
	XAC3384	Xanthomonas citri subsp. citri 306	Dunger et al. 2016	pilN	fimbrial assembly membrane protein	-	-	-	-	-	-	-	-	-	-	-	-	-	-	-	-	-	-	-	-	-	-	-	-	-	-	-
	XAC3385	Xanthomonas citri subsp. citri 306	Dunger et al. 2016	pilM	fimbrial assembly membrane protein	DK27_RS18530	97.0	99.0	AN652_RS17110	97.0	99.0	AN651_RS11855	97.0	99.0	XARJCFBP7179_RS09200	97.0	99.0	GW16_RS06285	97.0	99.0	J123_RS06090	97.0	99.0	X783_RS0103610	97.0	99.0	XARJCFBP7634_RS16045	97.0	99.0	XARJCFBP7651_RS14750	97.0	99.0
	XAC3805	Xanthomonas citri subsp. citri 306	Dunger et al. 2016	pilA	fimbrial protein	-	-	-	-	-	-	-	-	-	-	-	-	-	-	-	-	-	-	-	-	-	-	-	-	-	-	-
Nonfimbrial adhesins	XCV3670	Xanthomonas campestris pv. vesicatoria 85-10	Mhedbi-Hajri et al. 2011	xadA1	adhesin XadA	DK27_18045	86.0	83.0	AN652_16830	86.0	83.0	AN651_15015	99.0	82.0	XARJCFBP7179_RS17785	96.0	83.0	GW16_RS05425	98.0	82.0	J123_RS13615	91.0	83.0	X783_RS0110040	98.0	82.0	XARJCFBP7634_RS16910	98.0	82.0	XARJCFBP7651_RS21035	88.0	80.0
	XCV3672	Xanthomonas campestris pv. vesicatoria 85-10	Mhedbi-Hajri et al. 2011	-	adhesin	DK27_RS01140	90.0	74.0	AN652_RS16590	90.0	74.0	-	-	-	XARJCFBP7179_RS17775	90.0	74.0	GW16_RS05410	81.0	74.0	-	-	-	X783_RS0110050	90.0	75.0	XARJCFBP7634_RS16920	90.0	74.0	XARJCFBP7651_RS15650	90.0	74.0
	XOO0842	Xanthomonas oryzae pv. oryzae KACC 10331	Mhedbi-Hajri et al. 2011	-	membrane protein	-	-	-	-	-	-	-	-	-	-	-	-	-	-	-	-	-	-	-	-	-	-	-	-	-	-	-
	XOO0681	Xanthomonas oryzae pv. oryzae KACC 10331	Mhedbi-Hajri et al. 2011	-	adhesin	-	-	-	-	-	-	-	-	-	-	-	-	-	-	-	-	-	-	-	-	-	-	-	-	-	-	-
	XCV4444	Xanthomonas campestris pv. vesicatoria 85-10	Mhedbi-Hajri et al. 2011	-	hemagglutinin-related protein	DK27_05155	77.0	76.0	AN652_19635	97.0	84.0	AN651_14835	99.0	83.0	XARJCFBP7179_RS13885	97.0	83.0	-	-	-	J123_RS19380	97.0	83.0	-	-	-	-	-	-	-	-	-
	XCV4203	Xanthomonas campestris pv. vesicatoria 85-10	Mhedbi-Hajri et al. 2011	-	filamentous hemagglutinin-like protein	-	-	-	-	-	-	-	-	-	-	-	-	-	-	-	-	-	-	-	-	-	-	-	-	-	-	-
	XAC2151	Xanthomonas citri subsp. citri 306	Mhedbi-Hajri et al. 2011	yapH	YapH protein	DK27_10860	99.0	80.0	AN652_RS11185	84.0	81.0	AN651_16845	99.0	80.0	XARJCFBP7179_RS18155	98.0	81.0	GW16_14630	87.0	82.0	J123_RS13000	99.0	81.0	X783_RS0117845	84.0	82.0	XARJCFBP7634_RS02340	99.0	81.0	XARJCFBP7651_RS09245	99.0	80.0
	XCV1860	Xanthomonas campestris pv. vesicatoria 85-10	Mhedbi-Hajri et al. 2011	fhaB1	filamentous hemagglutinin-like protein	-	-	-	-	-	-	-	-	-	-	-	-	-	-	-	-	-	-	-	-	-	-	-	-	-	-	-
	XCV1861	Xanthomonas campestris pv. vesicatoria 85-10	Mhedbi-Hajri et al. 2011	fhaB2	filamentous hemagglutinin-like protein	-	-	-	-	-	-	-	-	-	-	-	-	-	-	-	-	-	-	-	-	-	-	-	-	-	-	-
	XCV1816	Xanthomonas campestris pv. vesicatoria 85-10	Mhedbi-Hajri et al. 2011	panB	3-methyl-2-oxobutanoate hydroxymethyltransferase	DK27_RS14790	99.0	97.0	AN652_14545	99.0	97.0	AN651_RS19460	99.0	96.0	XARJCFBP7179_RS06115	99.0	95.0	GW16_RS12905	99.0	96.0	J123_RS17515	99.0	97.0	X783_RS0114185	99.0	96.0	XARJCFBP7634_RS03560	99.0	96.0	XARJCFBP7651_RS07995	99.0	96.0
TonB-Dependent transporters	XCC0397	Xanthomonas campestris pv. campestris ATCC33913	Mhedbi-Hajri et al. 2011	-	TonB-dependent receptor	-	-	-	-	-	-	-	-	-	-	-	-	-	-	-	-	-	-	-	-	-	-	-	-	-	-	-
	XCC1719	Xanthomonas campestris pv. campestris ATCC33913	Mhedbi-Hajri et al. 2011	-	TonB-dependent receptor	DK27_RS05345	99.0	82.0	AN652_RS00410	99.0	82.0	-	-	-	XARJCFBP7179_RS05865	99.0	82.0	GW16_RS11040	99.0	82.0	J123_RS07100	99.0	82.0	-	-	-	XARJCFBP7634_RS03800	97.0	83.0	XARJCFBP7651_RS07750	97.0	83.0
	XCC1340	Xanthomonas campestris pv. campestris ATCC33913	Mhedbi-Hajri et al. 2011	-	TonB-dependent receptor	-	-	-	-	-	-	-	-	-	-	-	-	-	-	-	-	-	-	-	-	-	-	-	-	-	-	-
	XCC3595	Xanthomonas campestris pv. campestris ATCC33913	Mhedbi-Hajri et al. 2011	pbuA	ferric pseudobactin M114 receptor protein	DK27_RS00265	99.0	89.0	AN652_20380	99.0	89.0	AN651_RS04715	99.0	89.0	XARJCFBP7179_RS02460	99.0	89.0	GW16_RS17535	99.0	89.0	J123_RS04590	99.0	89.0	X783_RS0102085	99.0	89.0	XARJCFBP7634_RS09605	99.0	89.0	XARJCFBP7651_RS01970	99.0	89.0
	XCC3635	Xanthomonas campestris pv. campestris ATCC33913	Mhedbi-Hajri et al. 2011	-	hypothetical protein	-	-	-	-	-	-	-	-	-	-	-	-	-	-	-	-	-	-	-	-	-	-	-	-	-	-	-
	XCC4052	Xanthomonas campestris pv. campestris ATCC33913	Mhedbi-Hajri et al. 2011	fecA	TonB-dependent receptor	-	-	-	-	-	-	-	-	-	-	-	-	GW16_RS12595	98.0	87.0	-	-	-	-	-	-	XARJCFBP7634_RS20085	94.0	88.0	XARJCFBP7651_RS20525	98.0	87.0
	XCC4237	Xanthomonas campestris pv. campestris ATCC33913	Mhedbi-Hajri et al. 2011	oar	Oar protein	-	-	-	-	-	-	-	-	-	XARJCFBP7179_RS13690	99.0	90.0	-	-	-	-	-	-	-	-	-	XARJCFBP7634_RS12400	99.0	90.0	-	-	-
	XCC0304	Xanthomonas campestris pv. campestris ATCC33913	Mhedbi-Hajri et al. 2011	-	TonB-dependent receptor	-	-	-	-	-	-	AN651_RS11470	99.0	91.0	XARJCFBP7651_RS00640	99.0	91.0	GW16_RS01240	99.0	91.0	-	-	-	X783_RS0114415	99.0	91.0	XARJCFBP7634_RS10680	99.0	91.0	-	-	-
	XCC3518	Xanthomonas campestris pv. campestris ATCC33913	Mhedbi-Hajri et al. 2011	fpvA	ferripyoverdine receptor	-	-	-	-	-	-	-	-	-	-	-	-	-	-	-	-	-	-	-	-	-	-	-	-	-	-	-
	XCC4162	Xanthomonas campestris pv. campestris ATCC33913	Mhedbi-Hajri et al. 2011	-	ferrichrome-iron receptor 3	DK27_RS06925	98.0	93.0	-	-	-	AN651_RS08095	98.0	93.0	XARJCFBP7179_RS14155	98.0	93.0	GW16_RS03395	98.0	93.0	J123_RS19175	98.0	93.0	-	-	-	XARJCFBP7634_RS12765	98.0	93.0	XARJCFBP7651_RS17755	98.0	93.0
	XCC0305	Xanthomonas campestris pv. campestris ATCC33913	Mhedbi-Hajri et al. 2011	fhuA	TonB-dependent receptor	-	-	-	-	-	-	-	-	-	-	-	-	-	-	-	-	-	-	-	-	-	-	-	-	-	-	-
	XCC2046	Xanthomonas campestris pv. campestris ATCC33913	Mhedbi-Hajri et al. 2011	fecA	TonB-dependent receptor	-	-	-	-	-	-	-	-	-	-	-	-	-	-	-	-	-	-	-	-	-	-	-	-	-	-	-
	XCC0394	Xanthomonas campestris pv. campestris ATCC33913	Mhedbi-Hajri et al. 2011	fhuA	TonB-dependent receptor	-	-	-	-	-	-	-	-	-	-	-	-	-	-	-	-	-	-	-	-	-	-	-	-	-	-	-
	XCC0120	Xanthomonas campestris pv. campestris ATCC33913	Mhedbi-Hajri et al. 2011	iroN	TonB-dependent receptor	-	-	-	-	-	-	-	-	-	-	-	-	GW16_RS02295	99.0	95.0	-	-	-	X783_RS0114820	99.0	95.0	XARJCFBP7634_RS11690	99.0	95.0	XARJCFBP7651_RS18870	99.0	95.0
	XCC2867	Xanthomonas campestris pv. campestris ATCC33913	Mhedbi-Hajri et al. 2011	btuB	TonB-dependent receptor	-	-	-	-	-	-	AN651_RS01525	99.0	94.0	-	-	-	-	-	-	J123_RS09765	99.0	94.0	X783_RS0110890	99.0	94.0	-	-	-	-	-	-
	XAC3620	Xanthomonas citri subsp. citri 306	Mhedbi-Hajri et al. 2011	pfeA	outer membrane receptor FepA	-	-	-	AN652_RS01925	99.0	92.0	AN651_RS13585	99.0	91.0	XARJCFBP7179_RS17455	99.0	90.0	GW16_05265	99.0	91.0	J123_RS13255	99.0	92.0	X783_RS0105145	99.0	92.0	XARJCFBP7634_RS17510	99.0	91.0	XARJCFBP7651_RS15980	99.0	92.0
	XAC3201	Xanthomonas citri subsp. citri 306	Mhedbi-Hajri et al. 2011	fyuA	TonB-dependent receptor	-	-	-	AN652_RS08575	96.0	93.0	AN651_RS12485	96.0	93.0	XARJCFBP7179_RS10360	96.0	94.0	GW16_RS06900	96.0	94.0	-	-	-	X783_RS0119465	93.0	94.0	XARJCFBP7634_RS15300	96.0	93.0	XARJCFBP7651_RS14150	96.0	93.0
	XAC3077	Xanthomonas citri subsp. citri 306	Mhedbi-Hajri et al. 2011	cirA	TonB-dependent receptor	DK27_RS14935	99.0	93.0	AN652_RS08790	99.0	93.0	-	-	-	-	-	-	-	-	-	J123_RS09900	99.0	93.0	-	-	-	-	-	-	-	-	-
	XAC2193	Xanthomonas citri subsp. citri 306	Mhedbi-Hajri et al. 2011	cirA	TonB-dependent receptor	-	-	-	-	-	-	-	-	-	-	-	-	-	-	-	-	-	-	-	-	-	-	-	-	-	-	-
	XAC0291	Xanthomonas citri subsp. citri 306	Mhedbi-Hajri et al. 2011	oar	Oar protein	-	-	-	-	-	-	-	-	-	-	-	-	-	-	-	-	-	-	-	-	-	-	-	-	-	-	-
	XAC4062	Xanthomonas citri subsp. citri 306	Mhedbi-Hajri et al. 2011	fhuA	TonB-dependent receptor	-	-	-	-	-	-	-	-	-	-	-	-	-	-	-	-	-	-	-	-	-	-	-	-	-	-	-
	XAC2185	Xanthomonas citri subsp. citri 306	Mhedbi-Hajri et al. 2011	fhuA	ferrichrome-iron receptor	-	-	-	-	-	-	-	-	-	-	-	-	-	-	-	-	-	-	-	-	-	-	-	-	-	-	-
	XAC3498	Xanthomonas citri subsp. citri 306	Mhedbi-Hajri et al. 2011	fhuE	ferric iron uptake outer membrane protein	-	-	-	AN652_RS14700	99.0	97.0	AN651_RS18415	99.0	97.0	-	-	-	GW16_RS05720	99.0	97.0	J123_RS05485	99.0	97.0	X783_RS0109000	99.0	97.0	XARJCFBP7634_RS16610	99.0	97.0	XARJCFBP7651_RS15350	99.0	97.0
	XAC0852	Xanthomonas citri subsp. citri 306	Mhedbi-Hajri et al. 2011	-	TonB-dependent receptor	-	-	-	-	-	-	-	-	-	-	-	-	-	-	-	-	-	-	-	-	-	-	-	-	-	-	-
	XAC3613	Xanthomonas citri subsp. citri 306	Mhedbi-Hajri et al. 2011	btuB	TonB-dependent receptor	DK27_RS02440	98.0	96.0	-	-	-	AN651_RS13550	98.0	96.0	XARJCFBP7179_RS17490	98.0	96.0	GW16_RS05110	97.0	97.0	-	-	-	X783_RS0105110	98.0	96.0	XARJCFBP7634_RS17200	98.0	96.0	XARJCFBP7651_RS15945	98.0	97.0
	XAC3050	Xanthomonas citri subsp. citri 306	Mhedbi-Hajri et al. 2011	btuB	TonB-dependent receptor	-	-	-	-	-	-	-	-	-	-	-	-	-	-	-	-	-	-	-	-	-	-	-	-	-	-	-
	XCV3187	Xanthomonas campestris pv. vesicatoria 85-10	Mhedbi-Hajri et al. 2011	-	TonB-dependent outer membrane receptor	-	-	-	-	-	-	-	-	-	-	-	-	GW16_RS07555	99.0	94.0	-	-	-	-	-	-	-	-	-	XARJCFBP7651_RS13465	99.0	94.0
	XOO2829	Xanthomonas oryzae pv. oryzae KACC 10331	Mhedbi-Hajri et al. 2011	-	TonB-dependent receptor	-	-	-	-	-	-	-	-	-	-	-	-	-	-	-	-	-	-	-	-	-	-	-	-	-	-	-
Sensors of the two component regulatory system	XCV2152	Xanthomonas campestris pv. vesicatoria 85-10	Mhedbi-Hajri et al. 2011	-	two component system sensor protein	-	-	-	-	-	-	-	-	-	-	-	-	-	-	-	-	-	-	-	-	-	-	-	-	-	-	-
	XCV2155	Xanthomonas campestris pv. vesicatoria 85-10	Mhedbi-Hajri et al. 2011	-	two-component system sensor protein	-	-	-	-	-	-	-	-	-	-	-	-	-	-	-	-	-	-	-	-	-	-	-	-	-	-	-
	XCC2030	Xanthomonas campestris pv. campestris ATCC33913	Mhedbi-Hajri et al. 2011	-	sensor histidine kinase	-	-	-	-	-	-	-	-	-	-	-	-	-	-	-	-	-	-	-	-	-	-	-	-	-	-	-
	XCC3594	Xanthomonas campestris pv. campestris ATCC33913	Mhedbi-Hajri et al. 2011	fecR	transmembrane sensor	DK27_RS00260	99.0	77.0	AN652_RS20105	99.0	77.0	AN651_RS04710	99.0	77.0	XARJCFBP7179_RS02465	99.0	77.0	GW16_RS17530	99.0	76.0	J123_RS04595	99.0	77.0	X783_RS0102090	99.0	78.0	XARJCFBP7634_RS09610	99.0	77.0	XARJCFBP7651_RS01965	99.0	76.0
	XCV2310	Xanthomonas campestris pv. vesicatoria 85-10	Mhedbi-Hajri et al. 2011	qseC	two-component system sensor protein	-	-	-	-	-	-	-	-	-	-	-	-	-	-	-	-	-	-	-	-	-	-	-	-	-	-	-
	XCC0108	Xanthomonas campestris pv. campestris ATCC33913	Mhedbi-Hajri et al. 2011	-	two-component system sensor protein	-	-	-	-	-	-	-	-	-	-	-	-	-	-	-	-	-	-	-	-	-	-	-	-	-	-	-
	XAC2192	Xanthomonas citri subsp. citri 306	Mhedbi-Hajri et al. 2011	-	two-component system sensor protein	-	-	-	-	-	-	-	-	-	-	-	-	-	-	-	-	-	-	-	-	-	-	-	-	-	-	-
	XAC3473	Xanthomonas citri subsp. citri 306	Mhedbi-Hajri et al. 2011	-	sensor histidine kinase	DK27_RS15025	99.0	91.0	-	-	-	AN651_04555	99.0	90.0	XARJCFBP7179_RS08750	99.0	91.0	GW16_RS05835	99.0	91.0	J123_RS05645	99.0	91.0	X783_RS0109120	99.0	91.0	XARJCFBP7634_RS16495	99.0	91.0	XARJCFBP7651_RS15235	99.0	91.0
	XAC1994	Xanthomonas citri subsp. citri 306	Mhedbi-Hajri et al. 2011	-	HrpX-like protein	DK27_17480	99.0	93.0	AN652_18555	95.0	93.0	AN651_03245	95.0	94.0	XARJCFBP7179_RS18415	95.0	93.0	GW16_RS13845	99.0	93.0	J123_RS12740	95.0	93.0	-	-	-	XARJCFBP7634_RS02635	95.0	93.0	XARJCFBP7651_RS08950	95.0	94.0
	XAC2555	Xanthomonas citri subsp. citri 306	Mhedbi-Hajri et al. 2011	fixL	histidine kinase	DK27_06515	99.0	91.0	AN652_19580	99.0	91.0	AN651_15940	99.0	91.0	XARJCFBP7179_RS19350	99.0	91.0	GW16_RS16075	99.0	91.0	J123_RS15190	99.0	91.0	X783_RS0102195	99.0	90.0	XARJCFBP7634_RS00530	99.0	91.0	XARJCFBP7651_RS11315	99.0	91.0
	XAC1669	Xanthomonas citri subsp. citri 306	Mhedbi-Hajri et al. 2011	-	histidine kinase-response regulator hybrid protein	DK27_00440	99.0	87.0	AN652_08515	99.0	87.0	AN651_17425	99.0	87.0	XARJCFBP7179_RS05525	99.0	87.0	GW16_RS10695	99.0	87.0	J123_RS07445	99.0	87.0	X783_RS0116575	99.0	87.0	XARJCFBP7634_RS04145	99.0	87.0	XARJCFBP7651_RS07570	99.0	87.0
	XCV1919	Xanthomonas campestris pv. vesicatoria 85-10	Mhedbi-Hajri et al. 2011	rpfC	sensory/regulatory protein RpfC	-	-	-	-	-	-	-	-	-	-	-	-	-	-	-	-	-	-	-	-	-	-	-	-	-	-	-
	XCV4223	Xanthomonas campestris pv. vesicatoria 85-10	Mhedbi-Hajri et al. 2011	-	FecR family transmembrane sensor protein	-	-	-	-	-	-	-	-	-	-	-	-	-	-	-	-	-	-	-	-	-	-	-	-	-	-	-
	XAC0136	Xanthomonas citri subsp. citri 306	Mhedbi-Hajri et al. 2011	-	two-component system regulatory protein	-	-	-	-	-	-	AN651_08860	99.0	94.0	XARJCFBP7179_RS13050	99.0	94.0	GW16_RS02335	99.0	94.0	J123_RS16560	99.0	94.0	X783_RS0114775	99.0	94.0	XARJCFBP7634_RS11730	99.0	94.0	XARJCFBP7651_RS18830	99.0	94.0
	XAC0225	Xanthomonas citri subsp. citri 306	Mhedbi-Hajri et al. 2011	-	two-component system sensor protein	DK27_03785	99.0	83.0	AN652_20060	99.0	83.0	AN651_11130	99.0	83.0	XARJCFBP7179_RS04210	99.0	83.0	GW16_RS01775	99.0	83.0	J123_RS11650	99.0	83.0	X783_RS0120475	99.0	82.0	XARJCFBP7634_RS11205	99.0	83.0	XARJCFBP7651_RS00140	99.0	83.0
	XAC2167	Xanthomonas citri subsp. citri 306	Mhedbi-Hajri et al. 2011	-	two-component system sensor protein	-	-	-	-	-	-	-	-	-	-	-	-	-	-	-	-	-	-	-	-	-	-	-	-	-	-	-
	XAC3643	Xanthomonas citri subsp. citri 306	Mhedbi-Hajri et al. 2011	styS	histidine kinase-response regulator hybrid protein	-	-	-	-	-	-	-	-	-	-	-	-	-	-	-	-	-	-	-	-	-	-	-	-	-	-	-
	XAC0685	Xanthomonas citri subsp. citri 306	Mhedbi-Hajri et al. 2011	-	histidine kinase-response regulator hybrid protein	DK27_18080	99.0	93.0	AN652_02275	99.0	93.0	AN651_09980	99.0	92.0	XARJCFBP7179_RS01680	99.0	92.0	GW16_RS18325	99.0	93.0	J123_RS03780	99.0	93.0	X783_RS0113595	99.0	92.0	XARJCFBP7634_RS08805	99.0	93.0	XARJCFBP7651_RS02785	99.0	93.0
	XAC2054	Xanthomonas citri subsp. citri 306	Mhedbi-Hajri et al. 2011	-	two-component system sensor protein	DK27_00065	99.0	87.0	AN652_18915	99.0	87.0	AN651_18840	99.0	88.0	XARJCFBP7179_RS07520	99.0	87.0	GW16_RS14740	99.0	88.0	J123_RS17730	99.0	87.0	-	-	-	XARJCFBP7634_RS01805	99.0	88.0	XARJCFBP7651_RS09720	99.0	88.0
	XCV3165	Xanthomonas campestris pv. vesicatoria 85-10	Mhedbi-Hajri et al. 2011	-	two-component system sensor histidine kinase-response regulator hybrid protein	-	-	-	-	-	-	-	-	-	-	-	-	-	-	-	-	-	-	-	-	-	-	-	-	-	-	-
	XCV3166	Xanthomonas campestris pv. vesicatoria 85-10	Mhedbi-Hajri et al. 2011	-	two-component system sensor histidine kinase-response regulator hybrid protein	-	-	-	-	-	-	-	-	-	-	-	-	-	-	-	-	-	-	-	-	-	-	-	-	-	-	-
	XCV3167	Xanthomonas campestris pv. vesicatoria 85-10	Mhedbi-Hajri et al. 2011	-	two-component system sensor histidine kinase-response regulator hybrid protein	-	-	-	-	-	-	-	-	-	-	-	-	-	-	-	-	-	-	-	-	-	-	-	-	-	-	-
	XAC3031	Xanthomonas citri subsp. citri 306	Mhedbi-Hajri et al. 2011	-	histidine kinase-response regulator hybrid protein	DK27_19385	97.0	87.0	AN652_10095	97.0	87.0	AN651_06255	96.0	87.0	XARJCFBP7179_RS11140	98.0	87.0	-	-	-	J123_RS09670	98.0	87.0	X783_RS0110790	98.0	87.0	-	-	-	-	-	-
	XAC3673	Xanthomonas citri subsp. citri 306	Mhedbi-Hajri et al. 2011	-	histidine kinase	DK27_01960	96.0	83.0	AN652_16065	96.0	83.0	AN651_13980	96.0	83.0	XARJCFBP7179_RS17205	96.0	83.0	GW16_RS04825	96.0	83.0	J123_RS18670	96.0	83.0	X783_RS0117160	96.0	82.0	XARJCFBP7634_RS17760	96.0	83.0	XARJCFBP7651_RS16235	96.0	83.0
	XAC3683	Xanthomonas citri subsp. citri 306	Mhedbi-Hajri et al. 2011	-	sensor histidine kinase	DK27_RS14375	99.0	94.0	AN652_16110	99.0	94.0	AN651_14025	99.0	94.0	XARJCFBP7179_RS17160	99.0	94.0	GW16_RS04780	99.0	94.0	J123_RS18715	99.0	94.0	X783_RS0117205	99.0	94.0	XARJCFBP7634_RS17805	99.0	94.0	XARJCFBP7651_RS16280	99.0	94.0
	XAC2492	Xanthomonas citri subsp. citri 306	Mhedbi-Hajri et al. 2011	-	two-component system sensor protein	DK27_18580	90.0	89.0	AN652_20885	99.0	89.0	AN651_19360	99.0	88.0	XARJCFBP7179_RS06465	99.0	89.0	GW16_16295	99.0	90.0	J123_RS10870	99.0	89.0	X783_RS0116745	99.0	89.0	XARJCFBP7634_RS00835	99.0	89.0	XARJCFBP7651_RS11005	99.0	89.0
	XCV2105	Xanthomonas campestris pv. vesicatoria 85-10	Mhedbi-Hajri et al. 2011	-	two-component system sensor kinase	-	-	-	-	-	-	-	-	-	-	-	-	-	-	-	-	-	-	-	-	-	-	-	-	-	-	-
	XAC3994	Xanthomonas citri subsp. citri 306	Mhedbi-Hajri et al. 2011	-	two-component system sensor protein	DK27_06395	87.0	86.0	AN652_15240	87.0	86.0	AN651_04040	87.0	86.0	XARJCFBP7179_RS15440	87.0	86.0	GW16_RS11905	87.0	86.0	J123_RS14740	87.0	86.0	X783_RS0109600	87.0	86.0	-	-	-	XARJCFBP7651_RS19740	87.0	86.0
	XAC0759	Xanthomonas citri subsp. citri 306	Mhedbi-Hajri et al. 2011	kdpD	two-component system sensor protein	DK27_05760	98.0	95.0	AN652_18435	98.0	95.0	AN651_05570	98.0	95.0	XARJCFBP7179_RS01340	98.0	95.0	GW16_RS18635	98.0	95.0	J123_RS03445	98.0	95.0	X783_RS0112055	98.0	95.0	XARJCFBP7634_RS08500	98.0	95.0	XARJCFBP7651_RS03095	98.0	95.0
	XAC0135	Xanthomonas citri subsp. citri 306	Mhedbi-Hajri et al. 2011	-	two-component system sensor protein	DK27_19500	95.0	90.0	AN652_05810	95.0	90.0	AN651_08860	95.0	90.0	-	-	-	GW16_RS02340	99.0	91.0	-	-	-	X783_RS0114770	95.0	91.0	XARJCFBP7634_RS11735	95.0	90.0	XARJCFBP7651_RS18825	99.0	91.0
	XAC0207	Xanthomonas citri subsp. citri 306	Mhedbi-Hajri et al. 2011	ntrB	two-component system sensor protein	DK27_01240	99.0	98.0	AN652_19965	99.0	98.0	AN651_11035	99.0	98.0	XARJCFBP7179_RS12625	99.0	98.0	GW16_RS01870	99.0	98.0	J123_RS11905	99.0	98.0	X783_RS0118550	99.0	98.0	XARJCFBP7634_RS11300	99.0	98.0	XARJCFBP7651_RS19260	99.0	98.0
	XAC0326	Xanthomonas citri subsp. citri 306	Mhedbi-Hajri et al. 2011	smeS	two-component system sensor protein	-	-	-	-	-	-	-	-	-	-	-	-	-	-	-	-	-	-	-	-	-	-	-	-	-	-	-
	XAC0494	Xanthomonas citri subsp. citri 306	Mhedbi-Hajri et al. 2011	-	two-component system sensor protein	DK27_04340	95.0	92.0	AN652_14125	95.0	92.0	AN651_14395	96.0	90.0	XARJCFBP7179_RS02675	95.0	92.0	GW16_RS04250	95.0	92.0	J123_RS04810	95.0	92.0	X783_RS0103970	95.0	92.0	XARJCFBP7634_RS09810	99.0	92.0	XARJCFBP7651_RS01760	95.0	92.0
	XAC0620	Xanthomonas citri subsp. citri 306	Mhedbi-Hajri et al. 2011	algZ	two-component system sensor protein	DK27_05485	99.0	94.0	AN652_18290	99.0	94.0	AN651_10305	99.0	94.0	XARJCFBP7179_RS02005	99.0	94.0	GW16_RS17995	99.0	94.0	J123_RS04110	99.0	94.0	X783_RS0101555	99.0	94.0	XARJCFBP7634_RS09135	99.0	94.0	XARJCFBP7651_RS02450	99.0	94.0
	XAC0683	Xanthomonas citri subsp. citri 306	Mhedbi-Hajri et al. 2011	-	two-component system sensor protein	DK27_18090	97.0	92.0	AN652_02285	97.0	92.0	AN651_09990	97.0	92.0	XARJCFBP7179_RS01690	97.0	92.0	GW16_RS18315	97.0	92.0	J123_RS03790	97.0	92.0	X783_RS0113605	97.0	92.0	XARJCFBP7634_RS08815	97.0	92.0	XARJCFBP7651_RS02775	97.0	92.0
	XAC0835	Xanthomonas citri subsp. citri 306	Mhedbi-Hajri et al. 2011	colS	two-component system sensor protein	DK27_21120	98.0	91.0	AN652_04795	98.0	91.0	AN651_05235	98.0	91.0	XARJCFBP7179_RS00990	98.0	91.0	GW16_RS18980	98.0	91.0	J123_RS03080	98.0	91.0	X783_RS0104640	98.0	91.0	XARJCFBP7634_RS08155	98.0	91.0	XARJCFBP7651_RS03440	98.0	91.0
	XAC0897	Xanthomonas citri subsp. citri 306	Mhedbi-Hajri et al. 2011	torS	two-component system sensor protein	DK27_13115	99.0	96.0	AN652_11900	99.0	96.0	AN651_05010	99.0	96.0	XARJCFBP7179_RS00765	99.0	96.0	GW16_RS19200	99.0	96.0	J123_RS02855	99.0	96.0	X783_RS0104415	99.0	96.0	XARJCFBP7634_RS07930	99.0	96.0	XARJCFBP7651_RS03660	99.0	96.0
	XAC1041	Xanthomonas citri subsp. citri 306	Mhedbi-Hajri et al. 2011	phoR	two-component system sensor protein	-	-	-	AN652_17565	98.0	97.0	AN651_00070	98.0	97.0	XARJCFBP7179_RS00090	98.0	97.0	GW16_RS19895	98.0	97.0	J123_RS02120	98.0	97.0	X783_RS0105395	98.0	97.0	XARJCFBP7634_RS07245	98.0	97.0	XARJCFBP7651_RS04340	98.0	97.0
	XAC1222	Xanthomonas citri subsp. citri 306	Mhedbi-Hajri et al. 2011	colS	two-component system sensor protein	DK27_00680	98.0	89.0	AN652_09255	98.0	89.0	AN651_00865	99.0	89.0	XARJCFBP7179_RS20485	98.0	89.0	GW16_RS08445	98.0	89.0	J123_RS16120	98.0	88.0	X783_RS0112290	98.0	89.0	XARJCFBP7634_RS06310	98.0	89.0	XARJCFBP7651_RS05175	98.0	89.0
	XAC1228	Xanthomonas citri subsp. citri 306	Mhedbi-Hajri et al. 2011	-	two-component system sensor protein	DK27_00645	99.0	96.0	AN652_09290	99.0	96.0	AN651_00895	99.0	96.0	XARJCFBP7179_RS20520	99.0	96.0	GW16_RS08480	99.0	96.0	J123_RS16085	99.0	96.0	X783_RS0112255	99.0	96.0	XARJCFBP7634_RS06275	99.0	96.0	XARJCFBP7651_RS05210	99.0	96.0
	XAC1798	Xanthomonas citri subsp. citri 306	Mhedbi-Hajri et al. 2011	regS	two-component system sensor protein	DK27_22745	99.0	98.0	AN652_20585	99.0	98.0	AN651_19750	99.0	98.0	XARJCFBP7179_RS06175	99.0	98.0	GW16_RS12965	99.0	98.0	J123_RS17455	99.0	98.0	X783_RS0120555	99.0	98.0	XARJCFBP7634_RS03500	99.0	98.0	XARJCFBP7651_RS08055	99.0	98.0
	XCV2111	Xanthomonas campestris pv. vesicatoria 85-10	Mhedbi-Hajri et al. 2011	lytS	two-component system sensor protein	-	-	-	-	-	-	-	-	-	-	-	-	-	-	-	-	-	-	-	-	-	-	-	-	-	-	-
	XCV2155	Xanthomonas campestris pv. vesicatoria 85-10	Mhedbi-Hajri et al. 2011	-	two-component system sensor protein	-	-	-	-	-	-	-	-	-	-	-	-	-	-	-	-	-	-	-	-	-	-	-	-	-	-	-
	XCV2310	Xanthomonas campestris pv. vesicatoria 85-10	Mhedbi-Hajri et al. 2011	qseC	two-component system sensor protein	-	-	-	-	-	-	-	-	-	-	-	-	-	-	-	-	-	-	-	-	-	-	-	-	-	-	-
	XAC2854	Xanthomonas citri subsp. citri 306	Mhedbi-Hajri et al. 2011	creC	sensory histidine kinase CreC	DK27_11720	95.0	88.0	AN652_01670	95.0	88.0	AN651_19205	95.0	88.0	XARJCFBP7179_RS11835	95.0	88.0	GW16_RS17340	95.0	88.0	J123_RS08925	95.0	88.0	X783_RS0114930	95.0	88.0	XARJCFBP7634_RS13835	95.0	88.0	XARJCFBP7651_RS12645	95.0	88.0
	XCV3267	Xanthomonas campestris pv. vesicatoria 85-10	Mhedbi-Hajri et al. 2011	exsG	two-component system sensor protein	-	-	-	-	-	-	-	-	-	-	-	-	-	-	-	-	-	-	-	-	-	-	-	-	-	-	-
	XAC3249	Xanthomonas citri subsp. citri 306	Mhedbi-Hajri et al. 2011	colS	two-component system sensor protein	DK27_04925	99.0	95.0	AN652_RS18730	99.0	95.0	AN651_12440	99.0	95.0	XARJCFBP7179_RS10195	99.0	95.0	GW16_RS06720	99.0	95.0	J123_RS06575	99.0	95.0	X783_RS0111785	99.0	95.0	XARJCFBP7634_RS15485	99.0	95.0	XARJCFBP7651_RS14320	99.0	95.0
	XAC3482	Xanthomonas citri subsp. citri 306	Mhedbi-Hajri et al. 2011	tctE	two-component system sensor protein	DK27_15115	99.0	95.0	-	-	-	AN651_04595	99.0	95.0	XARJCFBP7179_RS08710	99.0	95.0	GW16_RS05795	99.0	96.0	J123_RS05600	99.0	95.0	X783_RS0109075	99.0	95.0	XARJCFBP7634_RS16535	99.0	95.0	XARJCFBP7651_RS15275	99.0	95.0
	XAC4022	Xanthomonas citri subsp. citri 306	Mhedbi-Hajri et al. 2011	phoQ	two-component system sensor protein	DK27_RS05850	99.0	98.0	AN652_15385	99.0	98.0	AN651_03895	99.0	98.0	XARJCFBP7179_RS15290	99.0	98.0	GW16_RS12050	99.0	98.0	J123_RS14595	99.0	98.0	X783_RS0109750	99.0	98.0	XARJCFBP7634_RS19515	99.0	98.0	XARJCFBP7651_RS19885	99.0	98.0
	XAC4193	Xanthomonas citri subsp. citri 306	Mhedbi-Hajri et al. 2011	-	two-component system sensor protein	DK27_02120	98.0	97.0	AN652_06150	98.0	97.0	AN651_09580	98.0	97.0	XARJCFBP7179_RS14605	98.0	97.0	GW16_13165	98.0	97.0	J123_RS13940	98.0	97.0	X783_RS0100370	98.0	97.0	XARJCFBP7634_RS20205	98.0	97.0	XARJCFBP7651_RS20650	98.0	97.0
	XAC1283	Xanthomonas citri subsp. citri 306	Mhedbi-Hajri et al. 2011	-	two-component system sensor protein	DK27_RS08785	97.0	87.0	AN652_10380	98.0	87.0	AN651_01170	98.0	87.0	XARJCFBP7179_RS20795	98.0	87.0	GW16_RS08755	98.0	87.0	J123_RS01240	98.0	87.0	X783_RS0103270	98.0	87.0	XARJCFBP7634_RS06000	98.0	87.0	XARJCFBP7651_RS05485	98.0	87.0
	XCV2145	Xanthomonas campestris pv. vesicatoria 85-10	Mhedbi-Hajri et al. 2011	virA	two-component VirA-like sensor kinase	-	-	-	-	-	-	-	-	-	-	-	-	-	-	-	-	-	-	-	-	-	-	-	-	-	-	-
	XAC0610	Xanthomonas citri subsp. citri 306	Mhedbi-Hajri et al. 2011	-	histidine kinase-response regulator hybrid protein	-	-	-	AN652_03585	95.0	85.0	AN651_10345	95.0	84.0	XARJCFBP7179_RS02045	95.0	85.0	GW16_RS17955	95.0	85.0	J123_RS04155	95.0	85.0	X783_RS0101595	95.0	85.0	XARJCFBP7634_RS09175	95.0	85.0	XARJCFBP7651_RS02405	95.0	85.0
	XAC1570	Xanthomonas citri subsp. citri 306	Mhedbi-Hajri et al. 2011	-	hypothetical protein	-	-	-	AN652_16360	99.0	87.0	AN651_13185	99.0	86.0	XARJCFBP7179_RS05035	99.0	87.0	GW16_RS10180	99.0	87.0	J123_RS07955	99.0	86.0	X783_RS0118210	99.0	86.0	XARJCFBP7634_RS04650	99.0	87.0	XARJCFBP7651_RS07055	99.0	87.0
	XAC1938	Xanthomonas citri subsp. citri 306	Mhedbi-Hajri et al. 2011	-	diguanylate cyclase	DK27_09800	99.0	86.0	AN652_10960	99.0	86.0	-	-	-	XARJCFBP7179_RS18680	99.0	87.0	GW16_RS13575	99.0	87.0	J123_RS12465	99.0	87.0	-	-	-	XARJCFBP7634_RS02905	99.0	87.0	XARJCFBP7651_RS08675	99.0	87.0
	XAC1940	Xanthomonas citri subsp. citri 306	Mhedbi-Hajri et al. 2011	-	diguanylate cyclase	-	-	-	AN652_10970	99.0	81.0	AN651_03515	99.0	82.0	XARJCFBP7179_RS18670	99.0	82.0	GW16_RS13585	99.0	82.0	J123_RS12475	99.0	82.0	-	-	-	XARJCFBP7634_RS02895	99.0	82.0	XARJCFBP7651_RS08685	99.0	82.0
	XAC2382	Xanthomonas citri subsp. citri 306	Mhedbi-Hajri et al. 2011	-	diguanylate cyclase	DK27_12350	99.0	96.0	AN652_09615	99.0	96.0	AN651_19965	99.0	96.0	XARJCFBP7179_RS06870	99.0	96.0	GW16_RS15345	99.0	96.0	J123_RS10445	99.0	96.0	X783_RS0118030	99.0	96.0	XARJCFBP7634_RS01235	99.0	96.0	XARJCFBP7651_RS10595	99.0	96.0
	XCV2623	Xanthomonas campestris pv. vesicatoria 85-10	Mhedbi-Hajri et al. 2011	-	sensor protein	-	-	-	-	-	-	-	-	-	-	-	-	-	-	-	-	-	-	-	-	-	-	-	-	-	-	-
	XAC2810	Xanthomonas citri subsp. citri 306	Mhedbi-Hajri et al. 2011	-	hypothetical protein	DK27_RS00970	99.0	91.0	AN652_13915	99.0	91.0	AN651_06705	99.0	91.0	-	-	-	GW16_RS17085	99.0	91.0	-	-	-	X783_RS0114105	99.0	91.0	XARJCFBP7634_RS13595	99.0	91.0	XARJCFBP7651_RS12395	99.0	91.0
	XAC3460	Xanthomonas citri subsp. citri 306	Mhedbi-Hajri et al. 2011	-	hypothetical protein	-	-	-	AN652_06780	99.0	88.0	AN651_04490	99.0	88.0	XARJCFBP7179_RS08815	99.0	88.0	GW16_RS05900	99.0	88.0	J123_RS05710	99.0	88.0	X783_RS0109185	99.0	88.0	XARJCFBP7634_RS16430	99.0	88.0	XARJCFBP7651_RS15170	99.0	88.0
	XAC1819	Xanthomonas citri subsp. citri 306	Mhedbi-Hajri et al. 2011	tspO	tryptophan-rich sensory protein	-	-	-	-	-	-	AN651_14820	99.0	84.0	-	-	-	GW16_RS13050	87.0	80.0	J123_RS17365	99.0	83.0	X783_RS0101365	99.0	83.0	XARJCFBP7634_RS03410	87.0	81.0	XARJCFBP7651_RS08145	87.0	80.0
	XAC1991	Xanthomonas citri subsp. citri 306	Mhedbi-Hajri et al. 2011	-	histidine kinase	DK27_17490	99.0	96.0	AN652_18545	99.0	96.0	AN651_03255	99.0	96.0	XARJCFBP7179_RS18425	99.0	96.0	GW16_RS13835	99.0	96.0	J123_RS12730	99.0	96.0	X783_RS0113265	99.0	96.0	XARJCFBP7634_RS02645	99.0	96.0	XARJCFBP7651_RS08940	99.0	96.0
	XAC2804	Xanthomonas citri subsp. citri 306	Mhedbi-Hajri et al. 2011	baeS	two-component system sensor protein	-	-	-	-	-	-	AN651_06675	99.0	82.0	-	-	-	-	-	-	-	-	-	-	-	-	XARJCFBP7634_RS13565	99.0	82.0	XARJCFBP7651_RS12365	99.0	82.0
	XAC3335	Xanthomonas citri subsp. citri 306	Mhedbi-Hajri et al. 2011	-	sensor histidine kinase	DK27_05215	70.0	90.0	AN652_18135	87.0	90.0	AN651_12260	87.0	90.0	XARJCFBP7179_RS09440	87.0	90.0	GW16_RS06530	87.0	90.0	J123_RS06330	87.0	90.0	X783_RS0103875	87.0	90.0	XARJCFBP7634_RS15810	87.0	90.0	XARJCFBP7651_RS14510	87.0	90.0
	XAC4283	Xanthomonas citri subsp. citri 306	Mhedbi-Hajri et al. 2011	-	sensor histidine kinase	DK27_22190	98.0	89.0	AN652_14625	98.0	89.0	AN651_12715	98.0	89.0	XARJCFBP7179_RS14235	98.0	89.0	GW16_RS11500	98.0	89.0	J123_RS20025	98.0	89.0	X783_RS0100775	98.0	89.0	XARJCFBP7634_RS20570	98.0	89.0	XARJCFBP7651_RS21000	98.0	89.0
	XAC1274	Xanthomonas citri subsp. citri 306	Mhedbi-Hajri et al. 2011	cvgSY	histidine kinase-response regulator hybrid protein	DK27_18510	99.0	90.0	AN652_10340	99.0	90.0	AN651_01130	99.0	90.0	XARJCFBP7179_RS20755	99.0	90.0	GW16_09025	99.0	90.0	J123_RS01280	99.0	90.0	X783_RS0103310	99.0	90.0	XARJCFBP7634_RS06040	99.0	90.0	XARJCFBP7651_RS05445	99.0	90.0
	XAC3720	Xanthomonas citri subsp. citri 306	Mhedbi-Hajri et al. 2011	-	hypothetical protein	-	-	-	AN652_04015	94.0	93.0	AN651_16345	94.0	93.0	XARJCFBP7179_RS16975	90.0	97.0	GW16_RS04560	94.0	97.0	J123_RS18900	94.0	94.0	X783_RS0105785	90.0	97.0	XARJCFBP7634_RS17975	94.0	93.0	XARJCFBP7651_RS16450	94.0	94.0
	XAC1273	Xanthomonas citri subsp. citri 306	Mhedbi-Hajri et al. 2011	-	two-component system sensor protein	DK27_18515	99.0	91.0	AN652_10335	99.0	91.0	AN651_01125	99.0	91.0	XARJCFBP7179_RS20750	99.0	91.0	GW16_RS08710	99.0	90.0	J123_RS01285	99.0	91.0	X783_RS0103315	99.0	91.0	XARJCFBP7634_RS06045	99.0	91.0	XARJCFBP7651_RS05440	99.0	91.0
	XAC1282	Xanthomonas citri subsp. citri 306	Mhedbi-Hajri et al. 2011	-	two-component system sensor protein	DK27_18465	99.0	83.0	AN652_10385	99.0	83.0	AN651_01175	99.0	82.0	XARJCFBP7179_RS20800	99.0	82.0	GW16_RS08760	99.0	82.0	J123_RS01235	99.0	82.0	X783_RS0103265	99.0	82.0	XARJCFBP7634_RS05995	99.0	83.0	XARJCFBP7651_RS05490	99.0	81.0
	XAC3975	Xanthomonas citri subsp. citri 306	Mhedbi-Hajri et al. 2011	-	two-component system sensor protein	DK27_06310	82.0	86.0	AN652_15155	82.0	86.0	AN651_04125	82.0	86.0	XARJCFBP7179_RS15525	82.0	87.0	GW16_RS11820	82.0	86.0	J123_RS14825	82.0	87.0	X783_RS0113780	82.0	86.0	XARJCFBP7634_RS19285	82.0	86.0	XARJCFBP7651_RS19655	82.0	86.0
	XAC1992	Xanthomonas citri subsp. citri 306	Mhedbi-Hajri et al. 2011	-	c-di-GMP phosphodiesterase A	DK27_17485	99.0	98.0	AN652_18550	99.0	98.0	AN651_03250	99.0	98.0	XARJCFBP7179_RS18420	99.0	98.0	GW16_RS13840	99.0	98.0	J123_RS12735	99.0	98.0	-	-	-	XARJCFBP7634_RS02640	99.0	98.0	XARJCFBP7651_RS08945	99.0	98.0
	XAC0729	Xanthomonas citri subsp. citri 306	Mhedbi-Hajri et al. 2011	-	two-component system sensor protein	DK27_17180	99.0	89.0	AN652_19745	99.0	89.0	AN651_09755	99.0	88.0	XARJCFBP7179_RS01425	99.0	88.0	GW16_RS18550	99.0	88.0	J123_RS03530	99.0	88.0	X783_RS0112145	99.0	88.0	XARJCFBP7634_RS08580	99.0	88.0	XARJCFBP7651_RS03010	99.0	88.0
	XAC1075	Xanthomonas citri subsp. citri 306	Mhedbi-Hajri et al. 2011		sensor histidine kinase	-	-	-	-	-	-	-	-	-	-	-	-	-	-	-	-	-	-	-	-	-	-	-	-	-	-	-
	XAC1074	Xanthomonas citri subsp. citri 306	Mhedbi-Hajri et al. 2011	-	sensor histidine kinase	DK27_05805	99.0	81.0	AN652_17625	99.0	81.0	AN651_00130	99.0	82.0	XARJCFBP7179_RS09750	99.0	81.0	GW16_RS19955	99.0	81.0	J123_RS02060	99.0	81.0	X783_RS0105455	99.0	81.0	XARJCFBP7634_RS07185	99.0	82.0	XARJCFBP7651_RS04400	99.0	82.0
	XAC2192	Xanthomonas citri subsp. citri 306	Mhedbi-Hajri et al. 2011	-	two-component system sensor protein	-	-	-	-	-	-	-	-	-	-	-	-	-	-	-	-	-	-	-	-	-	-	-	-	-	-	-
	XAC1993	Xanthomonas citri subsp. citri 306	Mhedbi-Hajri et al. 2011	-	hypothetical protein	DK27_17475	99.0	95.0	AN652_18560	99.0	95.0	AN651_03240	99.0	95.0	XARJCFBP7179_RS18410	99.0	95.0	GW16_14330	99.0	95.0	J123_RS12745	99.0	95.0	X783_RS0116215	99.0	95.0	XARJCFBP7634_RS02630	99.0	95.0	XARJCFBP7651_RS08955	99.0	95.0
	XAC2812	Xanthomonas citri subsp. citri 306	Mhedbi-Hajri et al. 2011	-	hypothetical protein	DK27_21885	99.0	89.0	AN652_13925	99.0	89.0	AN651_06715	99.0	89.0	XARJCFBP7179_RS12060	99.0	89.0	GW16_RS17095	99.0	89.0	J123_RS08675	99.0	89.0	X783_RS0114115	99.0	89.0	XARJCFBP7634_RS13605	99.0	89.0	XARJCFBP7651_RS12405	99.0	89.0
	XAC4358	Xanthomonas citri subsp. citri 306	Mhedbi-Hajri et al. 2011	-	hypothetical protein	DK27_05045	92.0	89.0	AN652_06395	92.0	89.0	AN651_16065	92.0	89.0	XARJCFBP7179_RS13780	92.0	89.0	GW16_RS03110	92.0	89.0	J123_RS20395	92.0	89.0	X783_RS0110370	92.0	89.0	XARJCFBP7634_RS12495	92.0	90.0	-	-	-
	XAC1488	Xanthomonas citri subsp. citri 306	Mhedbi-Hajri et al. 2011	-	sensor histidine kinase	DK27_RS03760	98.0	87.0	AN652_RS14805	98.0	87.0	AN651_16675	98.0	87.0	XARJCFBP7179_RS21880	98.0	87.0	GW16_RS09885	98.0	89.0	J123_RS00130	98.0	87.0	X783_RS0108945	81.0	88.0	XARJCFBP7634_RS04940	98.0	89.0	XARJCFBP7651_RS06765	98.0	89.0
	XAC1345	Xanthomonas citri subsp. citri 306	Mhedbi-Hajri et al. 2011	-	sensor histidine kinase	-	-	-	-	-	-	AN651_07745	99.0	89.0	XARJCFBP7179_RS21100	99.0	89.0	GW16_RS09105	99.0	89.0	J123_RS00930	99.0	89.0	X783_RS0102920	99.0	89.0	XARJCFBP7634_RS05685	99.0	89.0	XARJCFBP7651_RS05980	98.0	84.0
	XCC2179	Xanthomonas campestris pv. campestris ATCC33913	Mhedbi-Hajri et al. 2011	-	two-component system sensor protein	-	-	-	-	-	-	-	-	-	-	-	-	-	-	-	-	-	-	-	-	-	-	-	-	-	-	-
	XOO3147	Xanthomonas oryzae pv. oryzae KACC 10331	Mhedbi-Hajri et al. 2011	fixL	sensor histidine kinase	DK27_RS18280	99.0	93.0	AN652_RS19320	99.0	93.0	AN651_RS15760	99.0	93.0	XARJCFBP7179_RS19350	99.0	93.0	GW16_RS16075	99.0	93.0	J123_RS15190	99.0	93.0	X783_RS0102195	99.0	91.0	XARJCFBP7634_RS00530	99.0	93.0	XARJCFBP7651_RS11315	99.0	93.0
	XOO1477	Xanthomonas oryzae pv. oryzae KACC 10331	Mhedbi-Hajri et al. 2011	creC	two-component system sensor protein	-	-	-	-	-	-	-	-	-	-	-	-	-	-	-	-	-	-	-	-	-	-	-	-	-	-	-
	XOO3875	Xanthomonas oryzae pv. oryzae KACC 10331	Mhedbi-Hajri et al. 2011	-	two-component system sensor protein	-	-	-	-	-	-	-	-	-	-	-	-	-	-	-	-	-	-	-	-	-	-	-	-	-	-	-
	XOO3936	Xanthomonas oryzae pv. oryzae KACC 10331	Mhedbi-Hajri et al. 2011	-	sensor histidine kinase	-	-	-	-	-	-	-	-	-	-	-	-	-	-	-	-	-	-	-	-	-	-	-	-	-	-	-
	XOO0057	Xanthomonas oryzae pv. oryzae KACC 10331	Mhedbi-Hajri et al. 2011	-	histidine kinase	-	-	-	-	-	-	-	-	-	-	-	-	-	-	-	-	-	-	-	-	-	-	-	-	-	-	-
Methyl-accepting chemotaxis proteins	XCV0669	Xanthomonas campestris pv. vesicatoria 85-10	Mhedbi-Hajri et al. 2011	-	methyl-accepting chemotaxis protein	DK27_10995	95.0	96.0	AN652_21060	95.0	96.0	AN651_10340	95.0	96.0	XARJCFBP7179_RS02040	95.0	96.0	GW16_RS17960	96.0	95.0	J123_RS04150	95.0	96.0	X783_RS0101590	95.0	96.0	XARJCFBP7634_RS09170	95.0	96.0	XARJCFBP7651_RS02410	96.0	95.0
	XCV1702	Xanthomonas campestris pv. vesicatoria 85-10	Mhedbi-Hajri et al. 2011	-	methyl-accepting chemotaxis protein	DK27_00455	99.0	89.0	AN652_08500	99.0	89.0	AN651_17410	99.0	89	XARJCFBP7179_RS05510	99.0	89.0	GW16_RS10680	99.0	89.0	J123_RS07460	99.0	89.0	X783_RS0116590	99.0	89.0	XARJCFBP7634_RS04160	99.0	89.0	XARJCFBP7651_RS07555	99.0	89.0
	XCV1933	Xanthomonas campestris pv. vesicatoria 85-10	Mhedbi-Hajri et al. 2011	-	methyl-accepting chemotaxis protein	DK27_09195	99.0	91.0	AN652_03065	99.0	91.0	-	-	-	XARJCFBP7179_RS18860	99.0	91.0	GW16_RS13380	99.0	92.0	J123_RS12255	99.0	91.0	X783_RS0101040	99.0	92.0	XARJCFBP7634_RS03080	99.0	90.0	XARJCFBP7651_RS08480	99.0	92.0
	XCV1938	Xanthomonas campestris pv. vesicatoria 85-10	Mhedbi-Hajri et al. 2011	-	methyl-accepting chemotaxis protein	-	-	-	-	-	-	AN651_18220	99.0	90.0	-	-	-	GW16_RS13400	99.0	90.0	-	-	-	X783_RS0101020	99.0	90.0	-	-	-	XARJCFBP7651_RS08500	99.0	90.0
	XCV1939	Xanthomonas campestris pv. vesicatoria 85-10	Mhedbi-Hajri et al. 2011	-	methyl-accepting chemotaxis protein	-	-	-	-	-	-	-	-	-	-	-	-	-	-	-	-	-	-	-	-	-	-	-	-	-	-	-
	XCV1940	Xanthomonas campestris pv. vesicatoria 85-10	Mhedbi-Hajri et al. 2011	-	methyl-accepting chemotaxis protein	DK27_15950	93.0	80.0	AN652_16180	93.0	80.0	AN651_18230	93.0	86.0	XARJCFBP7179_RS18830	93.0	82.0	GW16_RS13410	93.0	86.0	J123_RS12285	87.0	80.0	X783_RS0101005	93.0	86.0	XARJCFBP7634_RS03045	93.0	82.0	XARJCFBP7651_RS08510	93.0	82.0
	XCV1941	Xanthomonas campestris pv. vesicatoria 85-10	Mhedbi-Hajri et al. 2011	-	methyl-accepting chemotaxis protein	DK27_15955	99.0	87.0	AN652_16185	99.0	87.0	AN651_18235	99.0	86.0	XARJCFBP7179_RS18825	98.0	85.0	GW16_RS13415	99.0	86.0	J123_RS12295	99.0	86.0	X783_RS0101000	99.0	87.0	-	-	-	XARJCFBP7651_RS08515	99.0	87.0
	XCV1942	Xanthomonas campestris pv. vesicatoria 85-10	Mhedbi-Hajri et al. 2011	-	methyl-accepting chemotaxis protein	-	-	-	-	-	-	-	-	-	-	-	-	-	-	-	-	-	-	-	-	-	-	-	-	-	-	-
	XCV1945	Xanthomonas campestris pv. vesicatoria 85-10	Mhedbi-Hajri et al. 2011	-	methyl-accepting chemotaxis protein	DK27_RS00310	96.0	85.0	-	-	-	AN651_18240	96.0	85.0	XARJCFBP7179_RS18820	96.0	84.0	GW16_RS13420	96.0	84.0	J123_RS12300	96.0	85.0	X783_RS0100995	95.0	85.0	-	-	-	XARJCFBP7651_RS08520	96.0	84.0
	XCV1948	Xanthomonas campestris pv. vesicatoria 85-10	Mhedbi-Hajri et al. 2011	-	methyl-accepting chemotaxis protein	DK27_15970	99.0	88.0	AN652_16200	99.0	88.0	AN651_18250	99.0	87.0	-	-	-	GW16_RS13430	99.0	89.0	J123_RS12310	99.0	88.0	X783_RS0100985	99.0	87.0	-	-	-	XARJCFBP7651_RS08530	99.0	87.0
	XCV1947	Xanthomonas campestris pv. vesicatoria 85-10	Mhedbi-Hajri et al. 2011	-	methyl-accepting chemotaxis protein	DK27_15965	99.0	93.0	AN652_16195	99.0	93.0	AN651_18245	99.0	93.0	XARJCFBP7179_RS18815	99.0	88.0	GW16_RS13425	99.0	93.0	J123_RS12305	99.0	93.0	X783_RS0100990	99.0	93.0	XARJCFBP7634_RS03040	99.0	90.0	XARJCFBP7651_RS08525	99.0	93.0
	XCV1951	Xanthomonas campestris pv. vesicatoria 85-10	Mhedbi-Hajri et al. 2011	-	methyl-accepting chemotaxis protein	DK27_16795	97.0	83.0	AN652_16210	97.0	83.0	AN651_18260	97.0	84.0	XARJCFBP7179_RS18810	97.0	83.0	GW16_RS13440	97.0	83.0	J123_RS12320	97.0	83.0	X783_RS0100975	97.0	83.0	-	-	-	XARJCFBP7651_RS08540	97.0	83.0
	XCV1952	Xanthomonas campestris pv. vesicatoria 85-10	Mhedbi-Hajri et al. 2011	-	methyl-accepting chemotaxis protein	DK27_16800	97.0	93.0	AN652_16215	97.0	93.0	AN651_18265	97.0	93.0	XARJCFBP7179_RS18805	99.0	92.0	GW16_RS13445	99.0	92.0	-	-	-	X783_RS0100970	99.0	92.0	-	-	-	XARJCFBP7651_RS08545	99.0	91.0
	XCV2044	Xanthomonas campestris pv. vesicatoria 85-10	Mhedbi-Hajri et al. 2011	-	methyl-accepting chemotaxis protein	DK27_RS03070	99.0	99.0	AN652_11105	99.0	99.0	AN651_01450	99.0	99.0	XARJCFBP7179_RS18400	99.0	99.0	GW16_14340	99.0	99.0	J123_RS12755	99.0	99.0	X783_RS0116225	99.0	99.0	XARJCFBP7634_RS02620	99.0	99.0	XARJCFBP7651_RS08965	99.0	99.0
	XCV2625	Xanthomonas campestris pv. vesicatoria 85-10	Mhedbi-Hajri et al. 2011	-	methyl-accepting chemotaxis protein	DK27_RS00645	99.0	94.0	-	-	-	AN651_17185	99.0	94.0	XARJCFBP7179_RS06680	99.0	93.0	GW16_RS15535	99.0	93.0	J123_RS10635	99.0	94.0	X783_RS0111085	99.0	94.0	XARJCFBP7634_RS01050	99.0	94.0	XARJCFBP7651_RS10785	99.0	94.0
	XCV3021	Xanthomonas campestris pv. vesicatoria 85-10	Mhedbi-Hajri et al. 2011	-	methyl-accepting chemotaxis protein	DK27_12930	99.0	92.0	AN652_RS01565	89.0	95.0	AN651_19240	99.0	92.0	XARJCFBP7179_RS11800	99.0	92.0	GW16_RS08355	99.0	92.0	J123_RS08965	99.0	92.0	X783_RS0111515	99.0	92.0	XARJCFBP7634_RS13870	99.0	92.0	XARJCFBP7651_RS12680	99.0	92.0
	XCV3261	Xanthomonas campestris pv. vesicatoria 85-10	Mhedbi-Hajri et al. 2011	-	methyl-accepting chemotaxis protein	DK27_05990	99.0	89.0	AN652_13540	99.0	89.0	AN651_01905	99.0	89.0	XARJCFBP7179_RS10650	99.0	89.0	GW16_RS07200	99.0	89.0	J123_RS19510	99.0	89.0	X783_RS0115205	99.0	89.0	XARJCFBP7634_RS15010	99.0	90.0	XARJCFBP7651_RS13865	99.0	89.0
	XCV3338	Xanthomonas campestris pv. vesicatoria 85-10	Mhedbi-Hajri et al. 2011	-	methyl-accepting chemotaxis protein	DK27_06660	97.0	90.0	AN652_05735	97.0	90.0	AN651_12560	97.0	89.0	XARJCFBP7179_RS10295	97.0	90.0	GW16_RS06835	97.0	90.0	J123_RS06660	97.0	90.0	X783_RS0111895	97.0	90.0	XARJCFBP7634_RS15365	97.0	90.0	XARJCFBP7651_RS14215	97.0	90.0
	XCV1778	Xanthomonas campestris pv. vesicatoria 85-10	Mhedbi-Hajri et al. 2011	-	methyl-accepting chemotaxis protein	DK27_RS05385	89.0	89.0	N652_00460	89.0	89.0	AN651_02845	90.0	88.0	XARJCFBP7179_RS05905	89.0	89.0	GW16_RS11080	89.0	89.0	J123_RS07060	89.0	89.0	X783_RS0113040	89.0	88.0	XARJCFBP7634_RS03760	89.0	89.0	XARJCFBP7651_RS07790	89.0	89.0
	XCV3577	Xanthomonas campestris pv. vesicatoria 85-10	Mhedbi-Hajri et al. 2011	-	methyl-accepting chemotaxis protein	DK27_RS05455	83.0	94.0	AN652_06720	99.0	94.0	AN651_04435	99.0	94.0	XARJCFBP7179_RS08875	99.0	95.0	GW16_RS05960	99.0	94.0	J123_RS05770	99.0	94.0	X783_RS0116170	99.0	94.0	XARJCFBP7634_RS16365	99.0	94.0	XARJCFBP7651_RS15110	99.0	95.0
	XCV3230	Xanthomonas campestris pv. vesicatoria 85-10	Mhedbi-Hajri et al. 2011	pilJ	methyl-accepting chemotaxis protein	DK27_06145	99.0	98.0	AN652_13385	99.0	98.0	AN651_01745	99.0	98.0	XARJCFBP7179_RS10805	99.0	98.0	GW16_RS07350	99.0	98.0	J123_RS19665	99.0	98.0	X783_RS0117495	99.0	98.0	XARJCFBP7634_RS14855	99.0	98.0	XARJCFBP7651_RS13715	99.0	98.0
	XAC3768	Xanthomonas citri subsp. citri 306	Mhedbi-Hajri et al. 2011	-	chemotaxis protein	DK27_19120	98.0	93.0	AN652_04195	98.0	93.0	AN651_16505	98.0	94.0	-	-	-	GW16_RS04375	98.0	93.0	-	-	-	X783_RS0105950	98.0	94.0	XARJCFBP7634_RS18140	98.0	94.0	XARJCFBP7651_RS16640	98.0	94.0
	XOO2840	Xanthomonas oryzae pv. oryzae KACC 10331	Mhedbi-Hajri et al. 2011	-	chemotaxis protein	-	-	-	-	-	-	-	-	-	-	-	-	-	-	-	-	-	-	-	-	-	-	-	-	-	-	-
	XOO_RS14045	Xanthomonas oryzae pv. oryzae KACC 10331	Mhedbi-Hajri et al. 2011	-	chemotaxis protein	-	-	-	-	-	-	-	-	-	-	-	-	-	-	-	-	-	-	-	-	-	-	-	-	-	-	-
	XCC0324	Xanthomonas campestris pv. campestris ATCC33913	Mhedbi-Hajri et al. 2011	tsr	chemotaxis protein	DK27_10965	97.0	80.0	AN652_05275	97.0	80.0	AN651_13295	97.0	80.0	-	-	-	GW16_RS01125	97.0	80.0	J123_RS10965	97.0	80.0	X783_RS0108210	97.0	81.0	XARJCFBP7634_RS10555	97.0	80.0	XARJCFBP7651_RS00805	97.0	80.0
	XCC0276	Xanthomonas campestris pv. campestris ATCC33913	Mhedbi-Hajri et al. 2011	tsr	chemotaxis protein	DK27_04605	96.0	91.0	AN652_13115	98.0	90.0	AN651_11475	99.0	90.0	XARJCFBP7179_RS03850	99.0	90.0	GW16_RS01395	98.0	90.0	J123_RS11285	99.0	89.0	X783_RS0114545	98.0	90.0	XARJCFBP7634_RS10835	99.0	90.0	XARJCFBP7651_RS00505	98.0	90.0
Xanthan biosynthesis	XCC2454	Xanthomonas campestris pv. campestris ATCC33913	Vorhölter et al. 2008	gumB	GumB protein	DK27_04050	99.0	94.0	AN652_08825	99.0	94.0	AN651_15795	99.0	94.0	XARJCFBP7179_RS19500	99.0	94.0	GW16_RS16225	99.0	94.0	J123_RS15340	99.0	93.0	X783_RS0102345	99.0	94.0	XARJCFBP7634_RS00285	99.0	94.0	XARJCFBP7651_RS11465	99.0	94.0
	XCC2453	Xanthomonas campestris pv. campestris ATCC33913	Vorhölter et al. 2008	gumC	GumC protein	DK27_04045	99.0	91.0	AN652_08820	99.0	91.0	AN651_15800	99.0	91.0	XARJCFBP7179_RS19495	99.0	91.0	GW16_RS16220	99.0	91.0	J123_RS15335	99.0	90.0	X783_RS0102340	99.0	91.0	XARJCFBP7634_RS00290	99.0	90.0	XARJCFBP7651_RS11460	99.0	91.0
	XCC2452	Xanthomonas campestris pv. campestris ATCC33913	Vorhölter et al. 2008	gumD	GumD protein	DK27_04040	99.0	97.0	AN652_08815	99.0	97.0	AN651_15805	99.0	97.0	XARJCFBP7179_RS19490	99.0	97.0	GW16_RS16215	99.0	97.0	J123_RS15330	99.0	97.0	X783_RS0102335	99.0	97.0	XARJCFBP7634_RS00295	99.0	97.0	XARJCFBP7651_RS11455	99.0	97.0
	XCC2451	Xanthomonas campestris pv. campestris ATCC33913	Vorhölter et al. 2008	gumE	gumE protein	DK27_04035	98.0	88.0	AN652_08810	98.0	88.0	AN651_15810	98.0	88.0	XARJCFBP7179_RS19485	98.0	88.0	GW16_RS16210	98.0	88.0	J123_RS15325	98.0	88.0	X783_RS0102330	98.0	89.0	XARJCFBP7634_RS00300	98.0	89.0	XARJCFBP7651_RS11450	98.0	89.0
	XCC2450	Xanthomonas campestris pv. campestris ATCC33913	Vorhölter et al. 2008	gumF	GumF protein	DK27_03850	92.0	83.0	AN652_08805	92.0	83.0	-	-	-	XARJCFBP7179_RS19480	92.0	83.0	GW16_RS16205	92.0	83.0	J123_RS15320	92.0	83.0	X783_RS0102325	92.0	83.0	-	-	-	XARJCFBP7651_RS11445	92.0	83.0
	XCC2449	Xanthomonas campestris pv. campestris ATCC33913	Vorhölter et al. 2008	gumG	GumG protein	-	-	-	-	-	-	-	-	-	-	-	-	-	-	-	-	-	-	-	-	-	-	-	-	-	-	-
	XCC2448	Xanthomonas campestris pv. campestris ATCC33913	Vorhölter et al. 2008	gumH	GumH protein	DK27_03855	99.0	90.0	AN652_08795	99.0	90.0	AN651_15825	99.0	90.0	XARJCFBP7179_RS19470	99.0	90.0	GW16_RS16195	99.0	91.0	J123_RS15310	99.0	90.0	X783_RS0102315	99.0	90.0	XARJCFBP7634_RS00315	99.0	90.0	XARJCFBP7651_RS11435	99.0	91.0
	XCC2447	Xanthomonas campestris pv. campestris ATCC33913	Vorhölter et al. 2008	gumI	GumI protein	DK27_03860	99.0	89.0	AN652_08790	99.0	89.0	AN651_15830	95.0	90.0	XARJCFBP7179_RS19465	99.0	89.0	GW16_RS16190	99.0	89.0	J123_RS15305	99.0	89.0	X783_RS0102315	99.0	89.0	XARJCFBP7634_RS00320	99.0	89.0	XCC2447	99.0	89.0
	XCC2446	Xanthomonas campestris pv. campestris ATCC33913	Vorhölter et al. 2008	gumJ	GumJ protein	DK27_03865	96.0	90.0	AN652_08785	96.0	90.0	AN651_15835	96.0	89.0	XARJCFBP7179_RS19460	99.0	90.0	GW16_RS16185	96.0	90.0	J123_RS15300	96.0	90.0	X783_RS0102305	96.0	90.0	XARJCFBP7634_RS00325	96.0	90.0	XARJCFBP7651_RS11425	96.0	90.0
	XCC2445	Xanthomonas campestris pv. campestris ATCC33913	Vorhölter et al. 2008	gumK	XCC2445	DK27_03870	99.0	92.0	AN652_08780	99.0	92.0	AN651_15840	99.0	93.0	XARJCFBP7179_RS19455	99.0	92.0	GW16_RS16180	99.0	93.0	J123_RS15295	99.0	93.0	X783_RS0102300	99.0	93.0	XARJCFBP7634_RS00330	99.0	92.0	XARJCFBP7651_RS11420	99.0	93.0
	XCC2444	Xanthomonas campestris pv. campestris ATCC33913	Vorhölter et al. 2008	gumL	GumL protein	DK27_03875	99.0	91.0	AN652_08775	99.0	91.0	AN651_15845	99.0	91.0	XARJCFBP7179_RS19450	99.0	91.0	GW16_RS16175	99.0	91.0	J123_RS15290	99.0	91.0	X783_RS0102295	99.0	91.0	XARJCFBP7634_RS00335	99.0	91.0	XARJCFBP7651_RS11415	99.0	91.0
	XCC2443	Xanthomonas campestris pv. campestris ATCC33913	Vorhölter et al. 2008	gumM	GumM protein	DK27_03880	92.0	95.0	AN652_08770	92.0	95.0	AN651_15850	92.0	96.0	XARJCFBP7179_RS19445	92.0	96.0	GW16_RS16170	92.0	96.0	J123_RS15285	92.0	95.0	X783_RS0102290	99.0	90.0	XARJCFBP7634_RS00340	92.0	96.0	XARJCFBP7651_RS11410	92.0	96.0
Type II secretion system	XCC0670	Xanthomonas campestris pv. campestris ATCC33913	Filloux et al. 2004; Szczesny et al. 2010	xpsD	general secretion pathway protein D	DK27_15625	99.0	83.0	AN652_07845	99.0	83.0	AN651_15075	99.0	83.0	XARJCFBP7179_RS17845	99.0	84.0	GW16_RS05485	99.0	84.0	J123_RS13685	99.0	84.0	X783_RS0109980	99.0	84.0	XARJCFBP7634_RS16850	99.0	84.0	XARJCFBP7651_RS15590	99.0	84.0
	XCC0660	Xanthomonas campestris pv. campestris ATCC33913	Filloux et al. 2004; Szczesny et al. 2010	xpsE	general secretion pathway protein E	DK27_18055	99.0	98.0	AN652_20745	99.0	98.0	AN651_RS14850	99.0	98.0	XARJCFBP7179_RS17795	99.0	98.0	GW16_RS05435	99.0	98.0	J123_RS13635	99.0	98.0	X783_RS0110030	99.0	98.0	XARJCFBP7634_RS16900	99.0	98.0	XARJCFBP7651_RS15640	99.0	98.0
	XCC0661	Xanthomonas campestris pv. campestris ATCC33913	Filloux et al. 2004; Szczesny et al. 2010	xpsF	general secretion pathway protein F	DK27_15580	99.0	96.0	AN652_20750	99.0	96.0	AN651_15030	99.0	96.0	XARJCFBP7179_RS17800	99.0	96.0	GW16_RS05440	99.0	96.0	J123_RS13640	99.0	96.0	X783_RS0110025	99.0	96.0	XARJCFBP7634_RS16895	99.0	96.0	XARJCFBP7651_RS15635	99.0	96.0
	XCC0662	Xanthomonas campestris pv. campestris ATCC33913	Filloux et al. 2004; Szczesny et al. 2010	xpsG	general secretion pathway protein G	DK27_15585	99.0	97.0	AN652_20755	99.0	97.0	AN651_15035	99.0	97.0	XARJCFBP7179_RS17805	99.0	97.0	GW16_RS05445	99.0	97.0	J123_RS13645	99.0	97.0	X783_RS0110020	99.0	97.0	XARJCFBP7634_RS16890	99.0	97.0	XARJCFBP7651_RS15630	99.0	97.0
	XCC0663	Xanthomonas campestris pv. campestris ATCC33913	Filloux et al. 2004; Szczesny et al. 2010	xpsH	general secretion pathway protein H	DK27_15590	99.0	86.0	AN652_20760	99.0	86.0	AN651_15040	99.0	85.0	XARJCFBP7179_RS17810	99.0	86.0	GW16_RS05450	99.0	86.0	J123_RS13650	99.0	86.0	X783_RS0110015	99.0	86.0	XARJCFBP7634_RS16885	99.0	86.0	XARJCFBP7651_RS15625	99.0	86.0
	XCC0664	Xanthomonas campestris pv. campestris ATCC33913	Filloux et al. 2004; Szczesny et al. 2010	xpsI	general secretion pathway protein I	DK27_15595	97.0	82.0	AN652_20765	97.0	82.0	AN651_15045	97.0	82.0	XARJCFBP7179_RS17815	97.0	83.0	GW16_RS05455	97.0	82.0	J123_RS13655	97.0	82.0	X783_RS0110010	97.0	82.0	XARJCFBP7634_RS16880	97.0	82.0	XARJCFBP7651_RS15620	97.0	82.0
	XCC0665	Xanthomonas campestris pv. campestris ATCC33913	Filloux et al. 2004; Szczesny et al. 2010	xpsJ	general secretion pathway protein J	DK27_15600	97.0	88.0	AN652_20770	97.0	88.0	AN651_15050	97.0	88.0	XARJCFBP7179_RS17820	97.0	88.0	GW16_RS05460	97.0	88.0	J123_RS13660	97.0	88.0	X783_RS0110005	97.0	88.0	XARJCFBP7634_RS16875	97.0	88.0	XARJCFBP7651_RS15615	97.0	88.0
	XCC0666	Xanthomonas campestris pv. campestris ATCC33913	Filloux et al. 2004; Szczesny et al. 2010	xpsK	general secretion pathway protein K	DK27_15605	98.0	90.0	AN652_20775	98.0	90.0	AN651_15055	98.0	90.0	XARJCFBP7179_RS17825	98.0	90.0	GW16_RS05465	98.0	90.0	J123_RS13665	98.0	90.0	X783_RS0110000	98.0	90.0	XARJCFBP7634_RS16870	98.0	90.0	XARJCFBP7651_RS15610	98.0	90.0
	XCC0667	Xanthomonas campestris pv. campestris ATCC33913	Filloux et al. 2004; Szczesny et al. 2010	xpsL	general secretion pathway protein L	DK27_15610	95.0	92.0	AN652_20780	95.0	92.0	AN651_15060	95.0	92.0	XARJCFBP7179_RS17830	95.0	92.0	GW16_RS05470	95.0	93.0	J123_RS13670	95.0	92.0	X783_RS0109995	95.0	93.0	XARJCFBP7634_RS16865	95.0	92.0	XARJCFBP7651_RS15605	95.0	92.0
	XCC0668	Xanthomonas campestris pv. campestris ATCC33913	Filloux et al. 2004; Szczesny et al. 2010	xpsM	general secretion pathway protein M	DK27_15615	93.0	92.0	AN652_20785	93.0	92.0	AN651_15065	93.0	93.0	XARJCFBP7179_RS17835	93.0	92.0	GW16_RS05475	93.0	93.0	J123_RS13675	93.0	92.0	X783_RS0109990	93.0	92.0	XARJCFBP7634_RS16860	93.0	93.0	XARJCFBP7651_RS15600	93.0	92.0
	XCC0669	Xanthomonas campestris pv. campestris ATCC33913	Filloux et al. 2004; Szczesny et al. 2010	xpsN	general secretion pathway protein N	DK27_15620	80.0	92.0	AN652_20790	64.0	93.0	AN651_15070	99.0	84.0	XARJCFBP7179_RS17840	99.0	84.0	GW16_RS05480	80.0	93.0	J123_RS13680	80.0	92.0	X783_RS0109985	99.0	84.0	XARJCFBP7634_RS16855	99.0	83.0	XARJCFBP7651_RS15595	99.0	83.0
	XCC3426	Xanthomonas campestris pv. campestris ATCC33913	Filloux et al. 2004; Szczesny et al. 2010	xcsC	type II secretion system protein C	-	-	-	-	-	-	-	-	-	-	-	-	-	-	-	-	-	-	-	-	-	-	-	-	-	-	-
	XCC3425	Xanthomonas campestris pv. campestris ATCC33913	Filloux et al. 2004; Szczesny et al. 2010	xcsD	type II secretion system protein D	DK27_18055	99.0	98.0	AN652_20745	99.0	98.0	AN651_RS14850	99.0	98.0	XARJCFBP7179_RS01630	91.0	96.0	GW16_RS18370	95.0	94	J123_RS03735	91.0	95.0	X783_RS0113545	95.0	93.0	XARJCFBP7634_RS08760	95.0	94.0	XARJCFBP7651_RS02830	91.0	95.0
	XCC3424	Xanthomonas campestris pv. campestris ATCC33913	Filloux et al. 2004; Szczesny et al. 2010	xcsE	type II secretion system protein E	DK27_12290	99.0	89.0	AN652_19410	99.0	89.0	AN651_09925	99.0	90.0	XARJCFBP7179_RS01625	99.0	90.0	GW16_19010	99.0	89.0	J123_RS03730	99.0	90.0	X783_RS0113540	99.0	90.0	XARJCFBP7634_RS08755	99.0	89.0	XARJCFBP7651_RS02835	80.0	90.0
	XCC3423	Xanthomonas campestris pv. campestris ATCC33913	Filloux et al. 2004; Szczesny et al. 2010	xcsF	type II secretion system protein F	DK27_12285	99.0	89.0	AN652_19405	99.0	89.0	AN651_09920	99.0	89.0	XARJCFBP7179_RS01620	99.0	89.0	GW16_RS18380	99.0	89.0	J123_RS03725	99.0	89.0	X783_RS0113535	99.0	89.0	XARJCFBP7634_RS08750	99.0	89.0	XARJCFBP7651_RS02840	99.0	89.0
	XCC3422	Xanthomonas campestris pv. campestris ATCC33913	Filloux et al. 2004; Szczesny et al. 2010	xcsG	type II secretion system protein G	DK27_12280	94.0	91.0	AN652_19400	94.0	91.0	AN651_09915	96.0	90.0	XARJCFBP7651_RS02845	94.0	91.0	GW16_RS18385	94.0	91.0	J123_RS03720	94.0	91.0	X783_RS0113530	96.0	91.0	XARJCFBP7634_RS08745	96.0	91.0	XARJCFBP7179_RS01615	95.0	91.0
	XCC3421	Xanthomonas campestris pv. campestris ATCC33913	Filloux et al. 2004; Szczesny et al. 2010	xcsH	type II secretion system protein H	-	-	-	-	-	-	-	-	-	-	-	-	-	-	-	-	-	-	-	-	-	-	-	-	-	-	-
	XCC3420	Xanthomonas campestris pv. campestris ATCC33913	Filloux et al. 2004; Szczesny et al. 2010	xcsI	type II secretion system protein I	-	-	-	-	-	-	-	-	-	-	-	-	-	-	-	-	-	-	-	-	-	-	-	-	-	-	-
	XCC3419	Xanthomonas campestris pv. campestris ATCC33913	Filloux et al. 2004; Szczesny et al. 2010	xcsJ	type II secretion system protein J	DK27_12265	96.0	81.0	AN652_19385	96.0	81.0	AN651_09900	96.0	81.0	XARJCFBP7179_RS01600	96.0	81.0	GW16_RS18400	96.0	81.0	J123_RS03705	96.0	81.0	X783_RS0113515	96.0	81.0	XARJCFBP7634_RS08730	96.0	80.0	XARJCFBP7651_RS02860	96.0	81.0
	XCC3418	Xanthomonas campestris pv. campestris ATCC33913	Filloux et al. 2004; Szczesny et al. 2010	xcsK	type II secretion system protein K	-	-	-	-	-	-	-	-	-	-	-	-	-	-	-	-	-	-	-	-	-	-	-	-	-	-	-
	XCC3417	Xanthomonas campestris pv. campestris ATCC33913	Filloux et al. 2004; Szczesny et al. 2010	xcsL	type II secretion system protein L	-	-	-	-	-	-	-	-	-	-	-	-	-	-	-	-	-	-	-	-	-	-	-	-	-	-	-
	XCC3416	Xanthomonas campestris pv. campestris ATCC33913	Filloux et al. 2004; Szczesny et al. 2010	xcsM	type II secretion system protein M	-	-	-	-	-	-	-	-	-	-	-	-	-	-	-	-	-	-	-	-	-	-	-	-	-	-	-
	XCC3415	Xanthomonas campestris pv. campestris ATCC33913	Filloux et al. 2004; Szczesny et al. 2010	xcsN	type II secretion system protein N	-	-	-	-	-	-	-	-	-	-	-	-	-	-	-	-	-	-	-	-	-	-	-	-	-	-	-
type III secretion system	XAC1265	Xanthomonas citri subsp. citri 306	Guo et al. 2011	hrpG	HrpG protein	DK27_RS08875	99.0	83.0	AN652_RS12900	99.0	83.0	AN651_RS01070	99.0	83.0	XARJCFBP7179_RS20705	96.0	83.0	GW16_RS08665	99.0	84.0	J123_RS01330	99.0	83.0	X783_RS0115965	99.0	83.0	XARJCFBP7634_RS06090	99.0	84.0	XARJCFBP7651_RS05395	99.0	84.0
	XAC1266	Xanthomonas citri subsp. citri 306	Guo et al. 2011	hrpXct	HrpX protein	DK27_RS08870	99.0	95.0	AN652_RS12905	99.0	95.0	AN651_RS01075	99.0	95.0	XARJCFBP7179_RS20710	99.0	95.0	GW16_RS08670	99.0	95.0	J123_RS01325	99.0	95.0	X783_RS0115960	99.0	95.0	XARJCFBP7634_RS06085	99.0	95.0	XARJCFBP7651_RS05400	99.0	95.0
	XAC0393	Xanthomonas citri subsp. citri 306	Guo et al. 2011	hpaF	HpaF protein	-	-	-	-	-	-	-	-	-	-	-	-	-	-	-	-	-	-	-	-	-	-	-	-	-	-	-
	XAC0394	Xanthomonas citri subsp. citri 306	Guo et al. 2011	hrpF	HrpF protein	-	-	-	-	-	-	-	-	-	-	-	-	-	-	-	-	-	-	-	-	-	-	-	-	-	-	-
	XAC0395	Xanthomonas citri subsp. citri 306	Guo et al. 2011	-	hypothetical protein	-	-	-	-	-	-	-	-	-	-	-	-	-	-	-	-	-	-	-	-	-	-	-	-	-	-	-
	XAC0396	Xanthomonas citri subsp. citri 306	Guo et al. 2011	hpaB	HpaB protein	DK27_RS09930	99.0	87.0	AN652_RS10620	99.0	87.0	-	-	-	XARJCFBP7179_RS02880	99.0	87.0	GW16_RS00195	99.0	87.0	J123_RS05015	99.0	87.0	-	-	-	-	-	-	XARJCFBP7651_RS01490	99.0	87.
	XAC0397	Xanthomonas citri subsp. citri 306	Guo et al. 2011	hrpE	HrpE protein	-	-	-	-	-	-	-	-	-	-	-	-	-	-	-	-	-	-	-	-	-	-	-	-	-	-	-
	XAC0398	Xanthomonas citri subsp. citri 306	Guo et al. 2011	hrpD6	HrpD6 protein	DK27_RS09940	99.0	81.0	AN652_RS10630	99.0	81.0	-	-	-	XARJCFBP7179_RS02870	99.0	82.0	GW16_RS00185	99.0	80.0	J123_RS05005	99.0	82.0	-	-	-	-	-	-	XARJCFBP7651_RS01500	99.0	80.0
	XAC0399	Xanthomonas citri subsp. citri 306	Guo et al. 2011	hrpD5	HrpD5 protein	-	-	-	-	-	-	-	-	-	-	-	-	-	-	-	-	-	-	-	-	-	-	-	-	-	-	-
	XAC0400	Xanthomonas citri subsp. citri 306	Guo et al. 2011	hpaA	HpaA protein	-	-	-	-	-	-	-	-	-	-	-	-	-	-	-	-	-	-	-	-	-	-	-	-	-	-	-
	XAC0401	Xanthomonas citri subsp. citri 306	Guo et al. 2011	hrcS	HrcS protein	DK27_RS09955	98.0	98.0	AN652_RS10645	98.0	98.0	-	-	-	XARJCFBP7179_RS02855	98.0	99.0	GW16_RS00170	98.0	99.0	J123_RS04990	98.0	99.0	-	-	-	-	-	-	XARJCFBP7651_RS01515	98.0	99.0
	XAC0402	Xanthomonas citri subsp. citri 306	Guo et al. 2011	hrcR	type III secretion system protein	DK27_RS09960	99.0	97.0	AN652_RS10650	99.0	97.0	-	-	-	XARJCFBP7179_RS02850	99.0	97.0	GW16_RS00165	99.0	97.0	J123_RS04985	99.0	97.0	-	-	-	-	-	-	XARJCFBP7651_RS01520	99.0	97.0
	XAC0403	Xanthomonas citri subsp. citri 306	Guo et al. 2011	hrcQ	HrcQ protein	-	-	-	-	-	-	-	-	-	-	-	-	-	-	-	-	-	-	-	-	-	-	-	-	-	-	-
	XAC0404	Xanthomonas citri subsp. citri 306	Guo et al. 2011	hpaP	HpaP protein	-	-	-	-	-	-	-	-	-	-	-	-	-	-	-	-	-	-	-	-	-	-	-	-	-	-	-
	XAC0405	Xanthomonas citri subsp. citri 306	Guo et al. 2011	HrcV protein	HrcV protein	DK27_RS09975	98.0	93.0	AN652_RS10665	98.0	93.0	-	-	-	XARJCFBP7179_RS02835	98.0	93.0	GW16_RS00150	98.0	93.0	J123_RS04970	98.0	93.0	-	-	-	-	-	-	XARJCFBP7651_RS01535	98.0	93.0
	XAC0406	Xanthomonas citri subsp. citri 306	Guo et al. 2011	hrcU	type III secretion system protein HrcU	DK27_RS09980	96.0	81.0				-	-	-	XARJCFBP7179_RS02830	96.0	80.0	GW16_RS00145	96.0	81.0	J123_RS04965	96.0	82.0	-	-	-	-	-	-	XARJCFBP7651_RS01540	96.0	81.0
	XAC0407	Xanthomonas citri subsp. citri 306	Guo et al. 2011	hrpB1	HrpB1 protein	DK27_RS09985	99.0	82.0	AN652_RS10675	99.0	82.0	-	-	-	XARJCFBP7179_RS02825	99.0	83.0	GW16_RS00140	99.0	83.0	J123_RS04960	99.0	82.0	-	-	-	-	-	-	XARJCFBP7651_RS01545	99.0	82.0
	XAC0408	Xanthomonas citri subsp. citri 306	Guo et al. 2011	hrpB2	HrpB2 protein	DK27_RS09990	99.0	85.0	AN652_RS10680	99.0	85.0	-	-	-	XARJCFBP7179_RS02820	99.0	87.0	GW16_RS00135	99.0	84.0	J123_RS04955	99.0	85.0	-	-	-	-	-	-	XARJCFBP7651_RS01550	99.0	84.0
	XAC0409	Xanthomonas citri subsp. citri 306	Guo et al. 2011	hrcJ	HrcJ protein	DK27_RS09995	89.0	83.0	AN652_RS10685	89.0	83.0	-	-	-	XARJCFBP7179_RS02815	89.0	80.0	GW16_RS00130	89.0	83.0	J123_RS04950	89.0	83.0	-	-	-	-	-	-	XARJCFBP7651_RS01555	89.0	83.0
	XAC0410	Xanthomonas citri subsp. citri 306	Guo et al. 2011	hrpB4	HrpB4 protein	-	-	-	-	-	-	-	-	-	-	-	-	-	-	-	-	-	-	-	-	-	-	-	-	-	-	-
	XAC0411	Xanthomonas citri subsp. citri 306	Guo et al. 2011	hrpB5	type III secretion system protein HrpB	DK27_RS10005	99.0	80.0	AN652_RS10695	99.0	80.0	-	-	-	XARJCFBP7179_RS02805	97.0	80.0	GW16_RS00120	99.0	80.0	J123_RS04940	99.0	80.0	-	-	-	-	-	-	XARJCFBP7651_RS01565	88.0	80.0
	XAC0412	Xanthomonas citri subsp. citri 306	Guo et al. 2011	hrcN	type III secretion system ATPase	DK27_RS10005	99.0	91.0	AN652_RS10695	99.0	91.0	-	-	-	XARJCFBP7179_RS02800	99.0	91.0	GW16_RS00115	99.0	91.0	J123_RS04935	99.0	91.0	-	-	-	-	-	-	XARJCFBP7651_RS01570	99.0	91.0
	XAC0413	Xanthomonas citri subsp. citri 306	Guo et al. 2011	hrpB7	HrpB7 protein	-	-	-	-	-	-	-	-	-	-	-	-	-	-	-	-	-	-	-	-	-	-	-	-	-	-	-
	XAC0414	Xanthomonas citri subsp. citri 306	Guo et al. 2011	hrcT	HrcT protein	DK27_RS10020	99.0	87.0	AN652_RS10710	99.0	87.0	-	-	-	XARJCFBP7179_RS02790	99.0	87.0	GW16_RS00105	99.0	87.0	J123_RS04925	99.0	87.0	-	-	-	-	-	-	XARJCFBP7651_RS01580	99.0	87.0
	XAC0415	Xanthomonas citri subsp. citri 306	Guo et al. 2011	hrcC	HrcC protein	DK27_RS10025	95.0	83.0	AN652_RS10715	99.0	83.0	-	-	-	XARJCFBP7179_RS02785	99.0	83.0	GW16_RS00100	99.0	83.0	J123_RS04920	99.0	83.0	-	-	-	-	-	-	XARJCFBP7651_RS01585	99.0	83.0
	XAC0416	Xanthomonas citri subsp. citri 306	Guo et al. 2011	hpa1	Hpa1 protein	-	-	-	-	-	-	-	-	-	-	-	-	-	-	-	-	-	-	-	-	-	-	-	-	-	-	-
	XAC0417	Xanthomonas citri subsp. citri 306	Guo et al. 2011	hpa2	Hpa2 protein	DK27_RS10035	88.0	93.0	AN652_RS10725	88.0	93.0	-	-	-	XARJCFBP7179_RS02775	88.0	93.0	GW16_RS00090	88.0	93.0	J123_RS04910	88.0	93.0	-	-	-	-	-	-	XARJCFBP7651_RS01595	88.0	93.0
	XC_3670	Xanthomonas campestris pv. campestris 8004	Li et al. 2014	hapS	histidine kinase/response regulator hybrid protein	DK27_08830	90.0	95.0	AN652_01865	90.0	95.0	AN651_13840	90.0	95.0	XARJCFBP7179_RS17350	90.0	95.0	GW16_05160	90.0	95.0	J123_RS13155	90.0	95.0	X783_RS0105250	90.0	95.0	XARJCFBP7634_RS17615	90.0	95.0	XARJCFBP7651_RS16085	90.0	95.0
	XC_3669	Xanthomonas campestris pv. campestris 8004	Li et al. 2014	hpaR2	histidine kinase/response regulator hybrid protein	DK27_08835	99.0	92.0	AN652_01870	99.0	92.0	AN651_13835	99.0	92.0	XARJCFBP7179_RS17355	99.0	92.0	GW16_05165	99.0	92.0	J123_RS13160	99.0	92.0	X783_RS0105245	99.0	92.0	XARJCFBP7634_RS17610	99.0	92.0	XARJCFBP7651_RS16080	99.0	92.0
type III effectors	XCC2100	Xanthomonas campestris pv. campestris ATCC33913	White et al. 2009	AvrBs1	avirulence protein	-	-	-	-	-	-	-	-	-	-	-	-	-	-	-	-	-	-	-	-	-	-	-	-	-	-	-
	XCC0052	Xanthomonas campestris pv. campestris ATCC33913	White et al. 2009	AvrBs2	avirulence protein	DK27_RS04020	96.0	96.0	AN652_RS02555	96.0	96.0	-	-	-	XARJCFBP7179_RS13380	96.0	98.0	GW16_RS02710	96.0	96.0	J123_RS16890	96.0	96.0	-	-	-	XARJCFBP7634_RS12105	96.0	98.0	XARJCFBP7651_RS18465	96.0	98.0
	X16130	Xanthomonas vesicatoria	Bonas et al. 1989	AvrBs3	avirulence protein	-	-	-	-	-	-	-	-	-	-	-	-	-	-	-	-	-	-	-	-	-	-	-	-	-	-	-
	JF826876.1	Xanthomonas arboricola pv. pruni CFBP5724	Hajri et al. 2012	xopA	type III effector protein	DK27_RS10030	100	100	AN652_RS10720	100	100	-	-	-	XARJCFBP7179_RS02780	100	100	GW16_RS00095	83.0	99.0	J123_RS04915	100	100	-	-	-	-	-	-	XARJCFBP7651_RS01590	83.0	99.0
	XACa0022	Xanthomonas citri subsp. citri 306	White et al. 2009	pthA1	avirulence protein	-	-	-	-	-	-	-	-	-	-	-	-	-	-	-	-	-	-	-	-	-	-	-	-	-	-	-
	XACa0039	Xanthomonas citri subsp. citri 306	White et al. 2009	pthA2	avirulence protein	-	-	-	-	-	-	-	-	-	-	-	-	-	-	-	-	-	-	-	-	-	-	-	-	-	-	-
	XACb0015	Xanthomonas citri subsp. citri 306	White et al. 2009	pthA3	avirulence protein	-	-	-	-	-	-	-	-	-	-	-	-	-	-	-	-	-	-	-	-	-	-	-	-	-	-	-
	XACb0065	Xanthomonas citri subsp. citri 306	White et al. 2009	pthA4	avirulence protein	-	-	-	-	-	-	-	-	-	-	-	-	-	-	-	-	-	-	-	-	-	-	-	-	-	-	-
	XCV0581	Xanthomonas campestris pv. vesicatoria 85-10	White et al. 2009	XopB	outer protein B	-	-	-	-	-	-	-	-	-	XARJCFBP7179_RS03560	85.0	90.0	-	-	-	-	-	-	-	-	-	-	-	-	-	-	-
	XCV2435	Xanthomonas campestris pv. vesicatoria 85-10	White et al. 2009	XopC1	outer protein C	-	-	-	-	-	-	-	-	-	-	-	-	-	-	-	-	-	-	-	-	-	-	-	-	-	-	-
	XOO3424	Xanthomonas oryzae pv. oryzae KACC 10331	White et al. 2009	XopC2	hypothetical protein	-	-	-	-	-	-	-	-	-	-	-	-	-	-	-	-	-	-	-	-	-	-	-	-	-	-	-
	XCV0437	Xanthomonas campestris pv. vesicatoria 85-10	White et al. 2009	XopD	outer protein D	-	-	-	-	-	-	-	-	-	-	-	-	-	-	-	-	-	-	-	-	-	-	-	-	-	-	-
	XAC0286	Xanthomonas citri subsp. citri 306	White et al. 2009	XopE1	avirulence protein	-	-	-	-	-	-	-	-	-	-	-	-	-	-	-	-	-	-	-	-	-	-	-	-	-	-	-
	XAP_pXAP410054	Xanthomonas arboricola pv. pruni CFBP5530	hajri et al. 2012	XopE2	C-terminal region of type III effector XopE2	DK27_19590	100	100	AN652_07835	100	100	-	-	-	-	-	-	-	-	-	J123_RS22190	99.0	85.0	-	-	-	-	-	-	-	-	-
	XAC3224	Xanthomonas citri subsp. citri 306	White et al. 2009	XopE3	avirulence protein	DK27_RS12705	99.0	98.0	AN652_RS04200	99.0	98.0	-	-	-	-	-	-	-	-	-	-	-	-	-	-	-	-	-	-	-	-	-
	JQ595991.1	Xanthomonas arboricola LMG 19146	Hajri et al. 2012	XopF1	outer protein F1	DK27_RS01240	98.0	87.0	AN652_RS10600	98.0	87.0	-	-	-	XARJCFBP7179_RS02900	100	97.0	GW16_RS00220	100	99.0	J123_RS05035	98.0	87.0	-	-	-	-	-	-	XARJCFBP7651_RS01470	100	97.0
	XCV2942	Xanthomonas campestris pv. vesicatoria 85-10	White et al. 2009	XopF2	outer protein F2	-	-	-	-	-	-	-	-	-	-	-	-	-	-	-	-	-	-	-	-	-	-	-	-	-	-	-
	JF826917.1	Xanthomonas arboricola pv. pruni CFBP5530	hajri et al. 2012	XopG	type III effector protein (xopG) gene	Partial sequence bp 8254 to 8880 contig 119 draft genome sequence	70.0	100	Partial sequence bp 33749 to 34375 contig 119 draft genome sequence	70.0	100	-	-	-	-	-	-	-	-	-	Partial sequence bp 8423 to 9048 contig 119 draft genome sequence	70.0	99.0	-	-	-	-	-	-	-	-	-
	XCVd0105	Xanthomonas campestris pv. vesicatoria 85-10	White et al. 2009	XopH	tyrosine phosphatase	-	-	-	-	-	-	-	-	-	-	-	-	-	-	-	-	-	-	-	-	-	-	-	-	-	-	-
	XAC0754	Xanthomonas citri subsp. citri 306	White et al. 2009	XopI	hypothetical protein	-	-	-	-	-	-	-	-	-	-	-	-	-	-	-	-	-	-	-	-	-	-	-	-	-	-	-
	XCV2156	Xanthomonas campestris pv. vesicatoria 85-10	White et al. 2009	XopJ1	outer protein J	-	-	-	-	-	-	-	-	-	-	-	-	-	-	-	-	-	-	-	-	-	-	-	-	-	-	-
	XCV0471	Xanthomonas campestris pv. vesicatoria 85-10	White et al. 2009	XopJ3	avirulence protein AvrRxv	-	-	-	-	-	-	-	-	-	-	-	-	-	-	-	-	-	-	-	-	-	-	-	-	-	-	-
	XCC3731	Xanthomonas campestris pv. campestris ATCC33913	White et al. 2009	XopJ5	avirulence protein	-	-	-	-	-	-	-	-	-	-	-	-	-	-	-	-	-	-	-	-	-	-	-	-	-	-	-
	XCV3215	Xanthomonas campestris pv. vesicatoria 85-10	White et al. 2009	XopK	hypothetical protein	DK27_RS14895	100	100	AN652_RS08830	100	100	-	-	-	XARJCFBP7179_RS10915	100	99.0	-	-	-	J123_RS09940	100	99.0	-	-	-	-	-	-	-	-	-
	XAC3090	Xanthomonas citri subsp. citri 306	White et al. 2009	XopL	leucin rich protein	DK27_RS20410	99.0	86.0	AN652_RS08905	99.0	86.0	-	-	-	XARJCFBP7179_RS10855	99.0	86.0	-	-	-	J123_RS19715	99.0	86.0	-	-	-	-	-	-	-	-	-
	XAC2786	Xanthomonas citri subsp. citri 306	White et al. 2009	XopN	hypothetical protein	DK27_RS20620	99.0	93.0	AN652_RS13635	99.0	93.0	-	-	-	XARJCFBP7179_RS12155	99.0	93.0	-	-	-	J123_RS08580	99.0	92.0	-	-	-	-	-	-	-	-	-
	XCV1055	Xanthomonas campestris pv. vesicatoria 85-10	White et al. 2009	XopO	outer protein O	-	-	-	-	-	-	-	-	-	-	-	-	-	-	-	-	-	-	-	-	-	-	-	-	-	-	-
	XAC1208	Xanthomonas citri subsp. citri 306	White et al. 2009	XopP	hypothetical protein	-	-	-	-	-	-	-	-	-	-	-	-	-	-	-	-	-	-	-	-	-	-	-	-	-	-	-
	JF826929.1	Xanthomonas arboricola pv. pruni CFBP5530	hajri et al. 2012	xopQ	type III effector protein (xopQ) gene	DK27_RS02995	96.0	100	AN652_RS03805	96.0	100	-	-	-	XARJCFBP7179_RS20190	96.0	99.0	-	-	-	J123_RS16425	96.0	99.0	-	-	-	-	-	-	-	-	-
	KT873949.1	Xanthomonas arboricola pv. pruni CFBP5530	Fischer-Le Saux et al. 2015 (deposited in the NCBI database but still unpublished)	XopR	outer protein R (xopR) gene	DK27_03500	100	99.0	AN652_08255	100	99.0	-	-	-	locus JZEG01000001 region 899760 to 901106	100	97.0	GW16_01520	100	96.0	locus APMC02000123 region 22155 to 23495	100	98.0	-	-	-	locus JZEH01000001 region 2589678 to 2591018	100	96.0	locus JZEI01000001 region 86504 to 87844	100	96.0
	XOO_2210	Xanthomonas oryzae pv. oryzae MAFF 311018	White et al. 2009	XopT	hypothetical protein	-	-	-	-	-	-	-	-	-	-	-	-	-	-	-	-	-	-	-	-	-	-	-	-	-	-	-
	XOO_2877	Xanthomonas oryzae pv. oryzae MAFF 311018	White et al. 2009	XopU	hypothetical protein	-	-	-	-	-	-	-	-	-	-	-	-	-	-	-	-	-	-	-	-	-	-	-	-	-	-	-
	JF826944.1	Xanthomonas arboricola pv. pruni CFBP5530	hajri et al. 2012	xopV	type III effector protein (xopV) gene	DK27_08130	100	100	AN652_03630	100	100	-	-	-	locus JZEG01000001 region 475476 to 476327	100	100	-	-	-	locus APMC02000049 region 1692 to 2543	100	99.0	-	-	-	-	-	-	-	-	-
	PXO_03356	Xanthomonas oryzae pv. oryzae PXO99A	White et al. 2009	XopW	hypothetical protein	-	-	-	-	-	-	-	-	-	-	-	-	-	-	-	-	-	-	-	-	-	-	-	-	-	-	-
	XCV0572	Xanthomonas campestris pv. vesicatoria 85-10	White et al. 2009	XopX	outer protein X	DK27_RS00225	99.0	92.0	AN652_RS20070	99.0	92.0	-	-	-	XARJCFBP7179_RS02500	99.0	92.0	-	-	-	J123_RS04630	99.0	92.0	-	-	-	-	-	-	-	-	-
	XOO_1488	Xanthomonas oryzae pv. oryzae MAFF 311018	White et al. 2009	XopY	hypothetical protein	-	-	-	-	-	-	-	-	-	-	-	-	-	-	-	-	-	-	-	-	-	-	-	-	-	-	-
	XOO_2402	Xanthomonas oryzae pv. oryzae MAFF 311018	White et al. 2009	XopZ1	hypothetical protein	DK27_RS03135	99.0	84.0	AN652_RS11005	99.0	84.0	-	-	-	XARJCFBP7179_RS18335	99.0	84.0	-	-	-	J123_RS12820	99.0	84.0	-	-	-	-	-	-	-	-	-
	XCV3785	Xanthomonas campestris pv. vesicatoria 85-10	White et al. 2009	XopAA	hypothetical protein	-	-	-	-	-	-	-	-	-	-	-	-	-	-	-	-	-	-	-	-	-	-	-	-	-	-	-
	XOO_3150	Xanthomonas oryzae pv. oryzae MAFF 311018	White et al. 2009	XopAB	hypothetical protein	-	-	-	-	-	-	-	-	-	-	-	-	-	-	-	-	-	-	-	-	-	-	-	-	-	-	-
	XCC2565	Xanthomonas campestris pv. campestris ATCC33913	White et al. 2009	XopAC	leucin rich protein	-	-	-	-	-	-	-	-	-	-	-	-	-	-	-	-	-	-	-	-	-	-	-	-	-	-	-
	XAC4213	Xanthomonas citri subsp. citri 306	White et al. 2009	XopAD	hypothetical protein	-	-	-	-	-	-	-	-	-	-	-	-	-	-	-	-	-	-	-	-	-	-	-	-	-	-	-
	XAC0393	Xanthomonas citri subsp. citri 306	White et al. 2009	XopAE	HpaF protein	-	-	-	-	-	-	-	-	-	-	-	-	-	-	-	-	-	-	-	-	-	-	-	-	-	-	-
	XCAW_b00003	Xanthomonas citri subsp. citri Aw12879	White et al. 2009	XopAF	type III effector protein XopAF	locus JHUQ01000178 region 520-1368	100	92.0	locus LJGN01000077 region 823-1671	100	92.0	-	-	-	-	-	-	-	-	-	locus APMC02000012 region 47201-47956	89.0	93.0	-	-	-	-	-	-	-	-	-
	XCC3600	Xanthomonas campestris pv. campestris ATCC33913	White et al. 2009	XopAG	hypothetical protein	-	-	-	-	-	-	-	-	-	-	-	-	-	-	-	-	-	-	-	-	-	-	-	-	-	-	-
	XCC2109	Xanthomonas campestris pv. campestris ATCC33913	White et al. 2009	XopAH	avirulence protein	DK27_RS19750	100	100	AN652_RS14715	100	100	-	-	-	-	-	-	-	-	-	J123_RS05470	100	100	-	-	-	-	-	-	-	-	-
	XAC3230	Xanthomonas citri subsp. citri 306	White et al. 2009	XopAI	hypothetical protein	DK27_07495	94.0	85.0	AN652_20970	94.0	85.0	-	-	-	locus JZEG01000005 region 197767 to 198619	95.0	86.0	-	-	-	locus APMC02000267 region 1000 to 1852	95.0	86.0	-	-	-	-	-	-	-	-	-
	XCV4428	Xanthomonas campestris pv. vesicatoria 85-10	White et al. 2009	XopAJ	avirulence protein AvrRxo1	-	-	-	-	-	-	-	-	-	-	-	-	-	-	-	-	-	-	-	-	-	-	-	-	-	-	-
	XAC3666	Xanthomonas citri subsp. citri 306	White et al. 2009	XopAK	hypothetical protein	-	-	-	-	-	-	-	-	-	-	-	-	-	-	-	-	-	-	-	-	-	-	-	-	-	-	-
	XCC1246	Xanthomonas campestris pv. campestris ATCC33913	White et al. 2009	XopAL1	hypothetical protein	-	-	-	-	-	-	-	-	-	-	-	-	-	-	-	-	-	-	-	-	-	-	-	-	-	-	-
	xccb100_0616	Xanthomonas campestris pv. campestris B100	White et al. 2009	XopAL2	hypothetical protein	-	-	-	-	-	-	-	-	-	-	-	-	-	-	-	-	-	-	-	-	-	-	-	-	-	-	-
	xcc-b100_3256	Xanthomonas campestris pv. campestris B100	White et al. 2009	XopAM	type III secretion system effector	-	-	-	-	-	-	-	-	-	-	-	-	-	-	-	-	-	-	-	-	-	-	-	-	-	-	-
	XGA_1250	Xanthomonas gardneri ATCC 19865	Potnis et al. 2011	XopAO	Xanthomonas outer protein AO	-	-	-	-	-	-	-	-	-	-	-	-	-	-	-	-	-	-	-	-	-	-	-	-	-	-	-
	XPE_1567	Xanthomonas perforans 91-118	Potnis et al. 2011	XopAP	putative Xanthomonas outer protein AP Lipase	-	-	-	-	-	-	-	-	-	-	-	-	-	-	-	-	-	-	-	-	-	-	-	-	-	-	-
	XGA_2091	Xanthomonas gardneri ATCC 19865	Potnis et al. 2011	XopAQ	Putative Xanthomonas outer protein AQ	locus JHUQ01000101 region 447 to 734	100	92.0	locus LJGN01000027 region 155 to 742	100	92.0	-	-	-	-	-	-	-	-	-	-	-	-	-	-	-	-	-	-	-	-	-
	XPE_2975	Xanthomonas perforans 91-118	Potnis et al. 2011	XopAR	putative Xanthomonas outer protein AR	-	-	-	-	-	-	-	-	-	-	-	-	-	-	-	-	-	-	-	-	-	-	-	-	-	-	-
	XGA_0765	Xanthomonas gardneri ATCC 19865	Potnis et al. 2011	XopAS	Putative Xanthomonas outer protein AS	-	-	-	-	-	-	-	-	-	-	-	-	-	-	-	-	-	-	-	-	-	-	-	-	-	-	-
	XCR_1464a	Xanthomonas campestris pv. raphani 756C	Bogdanove et al. 2011	XopAT	type III effector protein XopAT	-	-	-	-	-	-	-	-	-	-	-	-	-	-	-	-	-	-	-	-	-	-	-	-	-	-	-
	XAC0416	Xanthomonas citri subsp. citri 306	White et al. 2009	XopA	Hpa1 protein	-	-	-	-	-	-	-	-	-	-	-	-	-	-	-	-	-	-	-	-	-	-	-	-	-	-	-
	JQ595994.1	Xanthomonas arboricola LMG 19146	Vandroemme (deposited in the NCBI database but still unpublished)	hpaA	type three secretion system effector protein (hpaA) gene	DK27_RS09950	80.0	97.0	AN652_RS10640	100	96.0	-	-	-	XARJCFBP7179_RS02860	100	98.0	GW16_RS00175	100.0	99.0	J123_RS04995	100	96.0	-	-	-	-	-	-	XARJCFBP7651_RS01505	100.0	98.0
	JQ595993.1	Xanthomonas arboricola LMG 19146	Vandroemme (deposited in the NCBI database but still unpublished)	hrpW	type three secretion system effector protein (hrpW)	DK27_20030	100	96.0	AN652_RS10615	91.0	94.0	-	-	-	XARJCFBP7179_RS02885	91.0	93.0	GW16_RS00200	91.0	99.0	J123_RS05020	91.0	94.0	-	-	-	-	-	-	XARJCFBP7651_RS01485	91.0	98.0
	XCC4229	Xanthomonas campestris pv. campestris ATCC33913	White et al. 2009	AvrXccA1	avirulence protein	-	-	-	-	-	-	-	-	-	-	-	-	-	-	-	-	-	-	-	-	-	-	-	-	-	-	-
	xcc-b100_1770	Xanthomonas campestris pv. campestris B100	White et al. 2009	AvrXccA2	hypothetical protein	DK27_RS12515	84.0	85.0	AN652_RS03480	84.0	85.0	-	-	-	XARJCFBP7179_RS19220	84.0	80	-	-	-	J123_RS15060	84.0	85.0	-	-	-	-	-	-	-	-	-
* For complete Reference information see the article
